# Supplementary material for: Rhodium(i)-catalyzed 1,4-conjugate arylation toward β-fluoroalkylated electron-deficient alkenes: a new entry to a construction of a tertiary carbon center possessing a fluoroalkyl group
Source: Royal Society of Chemistry journal article supplement (doi:10.1039/c2ob26708j), 2012-11-08
Supplement: c2ob26708j.pdf [file c2ob26708j.pdf]

# **Rhodium(I)-Catalyzed 1,4-Conjugate Arylation toward $\beta$ -Fluoroalkylated Electron-Deficient Alkenes: A New Entry to a Construction of a Tertiary Carbon Center Possessing a Fluoroalkyl Group**

Atsunori Morigaki,<sup>a</sup> Tomoo Tanaka,<sup>b</sup>

Tomotsugu Miyabe,<sup>b</sup> Takashi Ishihara,<sup>b</sup> and Tsutomu Konno<sup>\*b</sup>

a) Functional Materials Research Laboratories  
Lion Corporation, 7-2-1 Hirai, Edogawa-ku, Tokyo 132-0035 (Japan)

b) Department of Chemistry and Materials Technology, Kyoto Institute of Technology  
Matsugasaki, Sakyo-ku, Kyoto 606-0962 (Japan)  
Fax: (+81) 75-724-7580, E-mail: konno@chem.kit.ac.jp (Japan)

sample

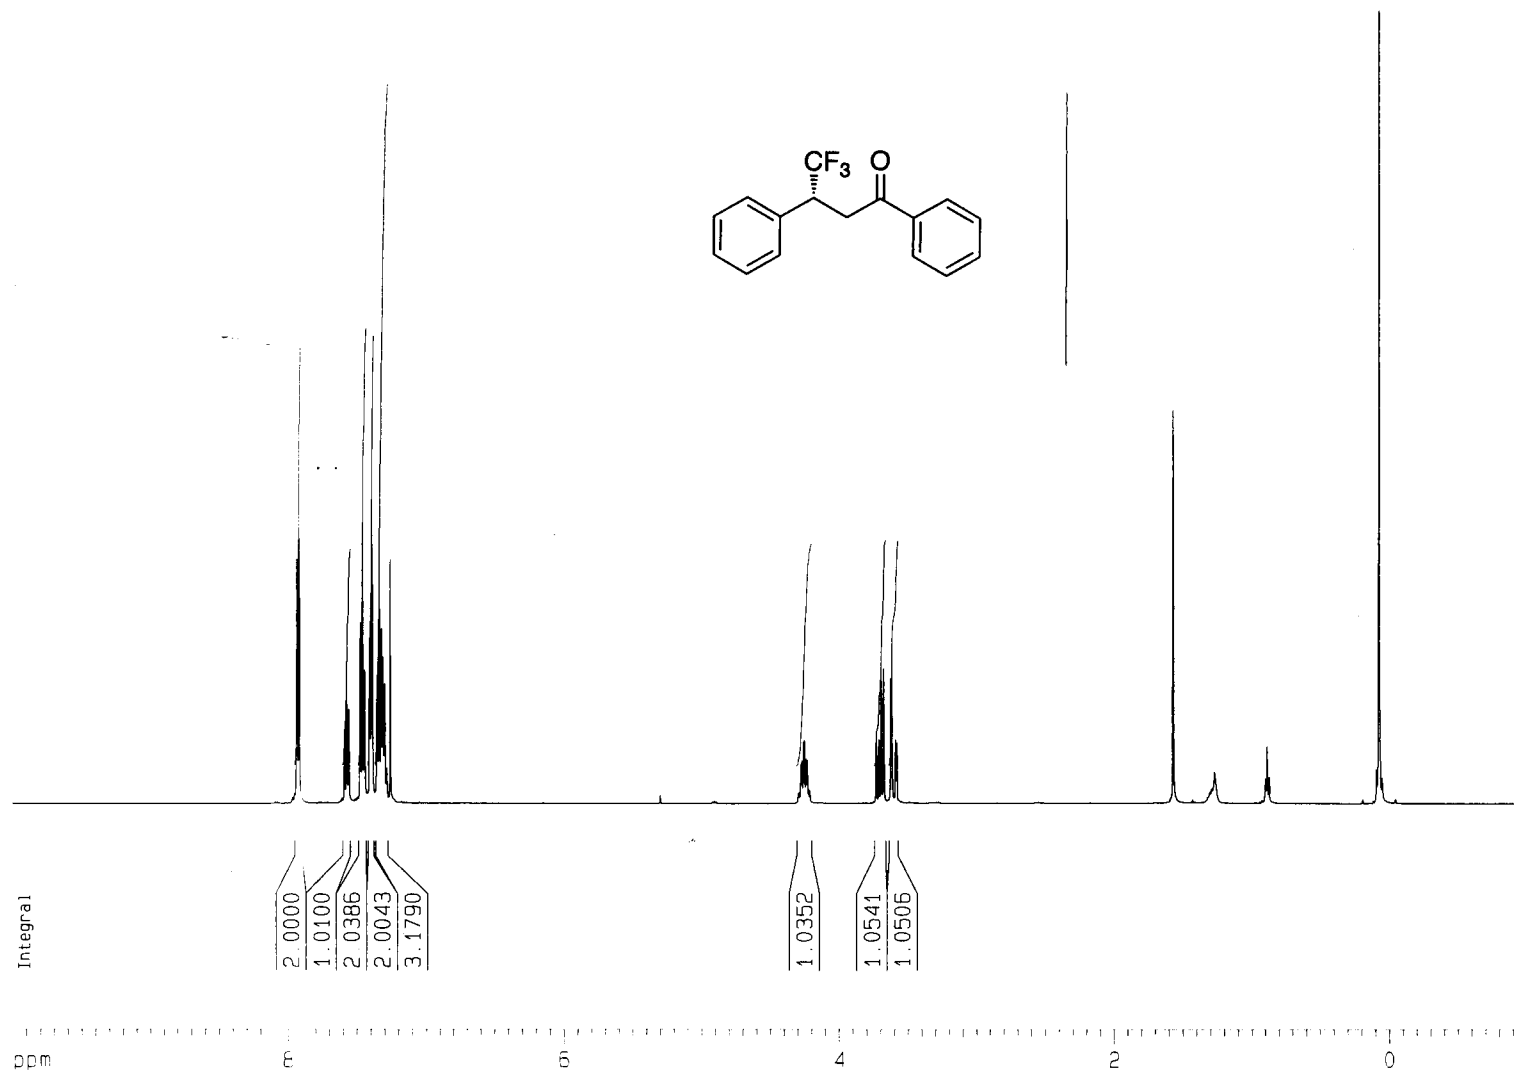

Current Data Parameters  
NAME tanaka-12-2  
EXPNO 1  
PROCNO 1

F2 - Acquisition Parameters  
Date\_ 20031202  
Time 19.35  
INSTRUM drx500  
PROBHD 5 mm Multinucl  
PULPROG zg30  
TD 65536  
SOLVENT CDCl3  
NS 16  
DS 2  
SWH 10330.578 Hz  
FIDRES 0.157632 Hz  
AQ 3.1719923 sec  
RG 362  
DW 48.400 usec  
DE 6.00 usec  
TE 295.5 K  
D1 1.00000000 sec  
MCREST 0.00000000 sec  
MCWRK 0.01500000 sec

===== CHANNEL f1 =====  
NUC1 1H  
P1 10.30 usec  
PL1 -6.00 dB  
SF01 500.1330885 MHz

F2 - Processing parameters  
SI 32768  
SF 500.1300134 MHz  
WDW EM  
SSB 0  
LB 0.30 Hz  
GB 0  
PC 1.00

1D NMR plot parameters  
CX 20.00 cm  
CY 11.89 cm  
F1P 10.000 ppm  
F1 5001.30 Hz  
F2P -1.000 ppm  
F2 -500.13 Hz  
PPMCM 0.55000 ppm/cm  
HZCM 275.07150 Hz/cm

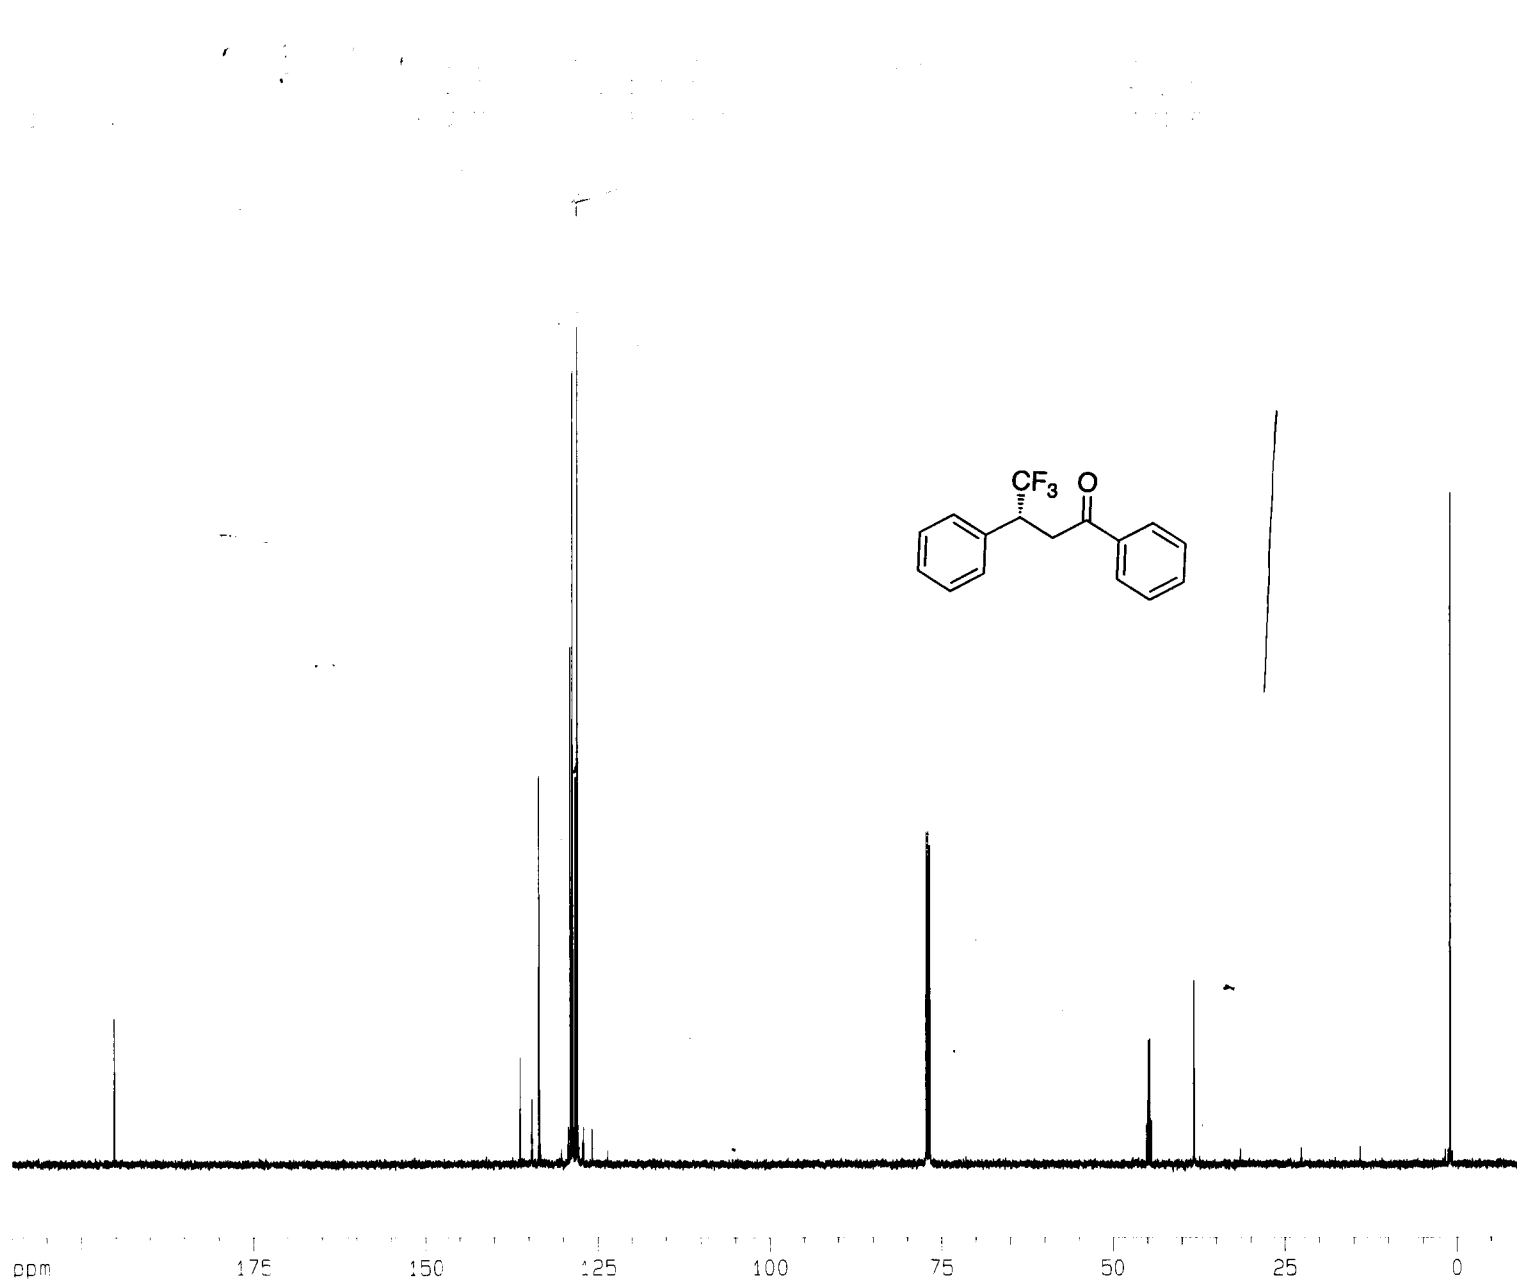

Current Data Parameters  
NAME tanaka-03 11.21  
EXPNO 2  
PROCNO 1

F2 - Acquisition Parameters  
Date\_ 20031121  
Time 15.36  
INSTRUM drx500  
PROBHD 5 mm Multinuc1  
PULPROG zgpg30  
TD 65536  
SOLVENT CDC13  
NS 256  
DS 2  
SWH 30030.029 Hz  
FIDRES 0.458222 Hz  
AQ 1.0912244 sec  
RG 3649.1  
QW 16.650 usec  
DE 6.00 usec  
TE 296.5 K  
D1 0.50000000 sec  
d11 0.03000000 sec  
MCREST 0.00000000 sec  
MCWRK 0.01500000 sec

===== CHANNEL f1 =====  
NUC1 13C  
P1 5.70 usec  
PL1 -2.00 dB  
SF01 125.7703643 MHz

===== CHANNEL f2 =====  
CPDPRG2 waltz16  
NUC2 1H  
PCPD2 100.00 usec  
PL2 -6.00 dB  
PL12 13.74 dB  
PL13 13.74 dB  
SF02 500.1320005 MHz

F2 - Processing parameters  
SI 32768  
SF 125.7577960 MHz  
WDW EM  
SSB 0  
LB 1.00 Hz  
GB 0  
PC 0.10

1D NMR plot parameters  
CX 20.00 cm  
CY 11.15 cm  
F1P 210.000 ppm  
F1 26409.14 Hz  
F2P -10.000 ppm  
F2 -1257.58 Hz  
PPMCM 11.00000 ppm/cm  
HZCM 1383.33569 Hz/cm

ta.Rxn96 proton

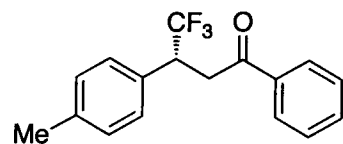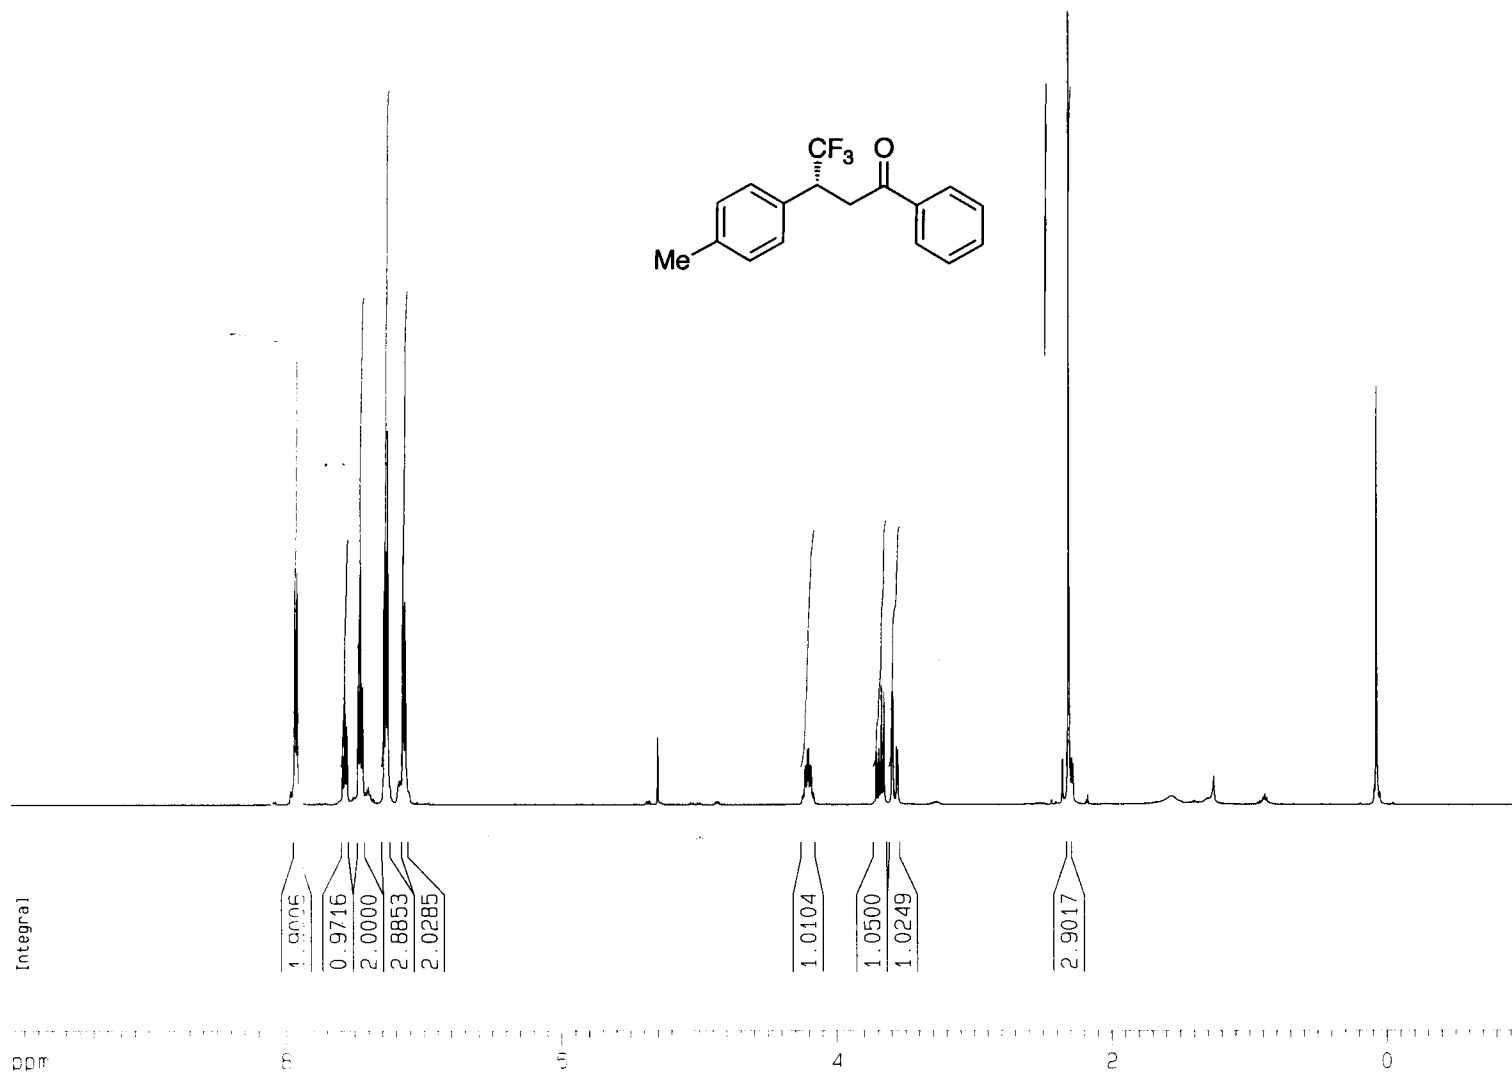

Current Data Parameters

NAME tanaka-12-9  
EXPNO 1  
PROCNO 1

F2 - Acquisition Parameters

Date\_ 20031209  
Time 12.35  
INSTRUM drx500  
PROBHD 5 mm Multinucl  
PULPROG zg30  
TD 65536  
SOLVENT CDC13  
NS 16  
DS 2  
SWH 10330.578 Hz  
FIDRES 0.157632 Hz  
AQ 3.1719923 sec  
RG 512  
DW 48.400 usec  
DE 6.00 usec  
TE 295.4 K  
D1 1.00000000 sec  
MCREST 0.00000000 sec  
MCWRK 0.01500000 sec

==== CHANNEL f1 =====

NUC1 1H  
P1 10.30 usec  
PL1 -6.00 dB  
SF01 500.1330885 MHz

F2 - Processing parameters

SI 32768  
SF 500.1300131 MHz  
WDW EM  
SSB 0  
LB 0.30 Hz  
GB 0  
PC 1.00

1D NMR plot parameters

CX 20.00 cm  
CY 11.55 cm  
F1P 10.000 ppm  
F1 5001.30 Hz  
F2P -1.000 ppm  
F2 -500.13 Hz  
PPMCM 0.55000 ppm/cm  
HZCM 275.07150 Hz/cm

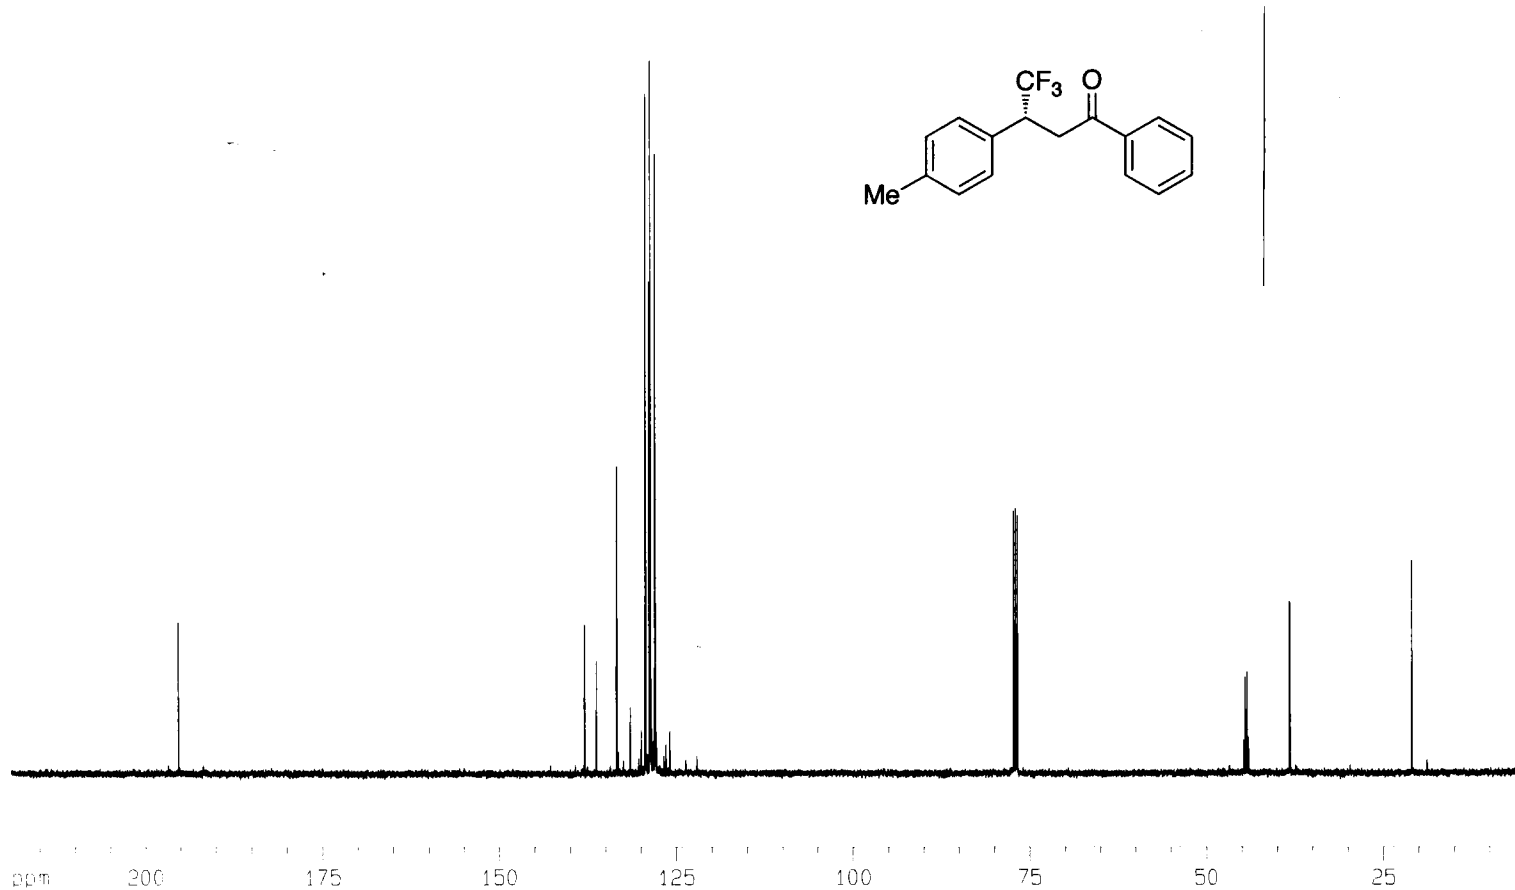

Current Data Parameters  
NAME tanaka-04.6.17  
EXPNO 3  
PROCNO 1

F2 - Acquisition Parameters

Date\_ 20040617  
Time 10.10  
INSTRUM drx500  
PROBHD 5 mm Multinuc1  
PULPROG zgpg30  
TD 65536  
SOLVENT CDCl3  
NS 256  
DS 2  
SWH 30030.029 Hz  
FIDRES 0.458222 Hz  
AQ 1.0912244 sec  
RG 2896.3  
DW 16.650 usec  
DE 6.00 usec  
TE 298.1 K  
D1 0.5000000 sec  
d11 0.0300000 sec  
MCREST 0.0000000 sec  
MCWRK 0.0150000 sec

==== CHANNEL f1 =====  
NUC1 13C  
P1 5.70 usec  
PL1 -2.00 dB  
SF01 125.7703643 MHz

==== CHANNEL f2 =====  
CPDPRG2 waltz16  
NUC2 1H  
PCPD2 100.00 usec  
PL2 -6.00 dB  
PL12 13.74 dB  
PL13 13.74 dB  
SF02 500.1320005 MHz

F2 - Processing parameters

SF 32768  
SF 125.7577978 MHz  
WDW EM  
SSB 0  
LB 1.00 Hz  
GB 0  
PC 1.40

1D NMR plot parameters

CX 20.00 cm  
CY 9.41 cm  
F1P 219.000 ppm  
F1 27540.96 Hz  
F2P 5.000 ppm  
F2 628.79 Hz  
PPMCM 10.70000 ppm/cm  
HZCM 1345.60840 Hz/cm

sample

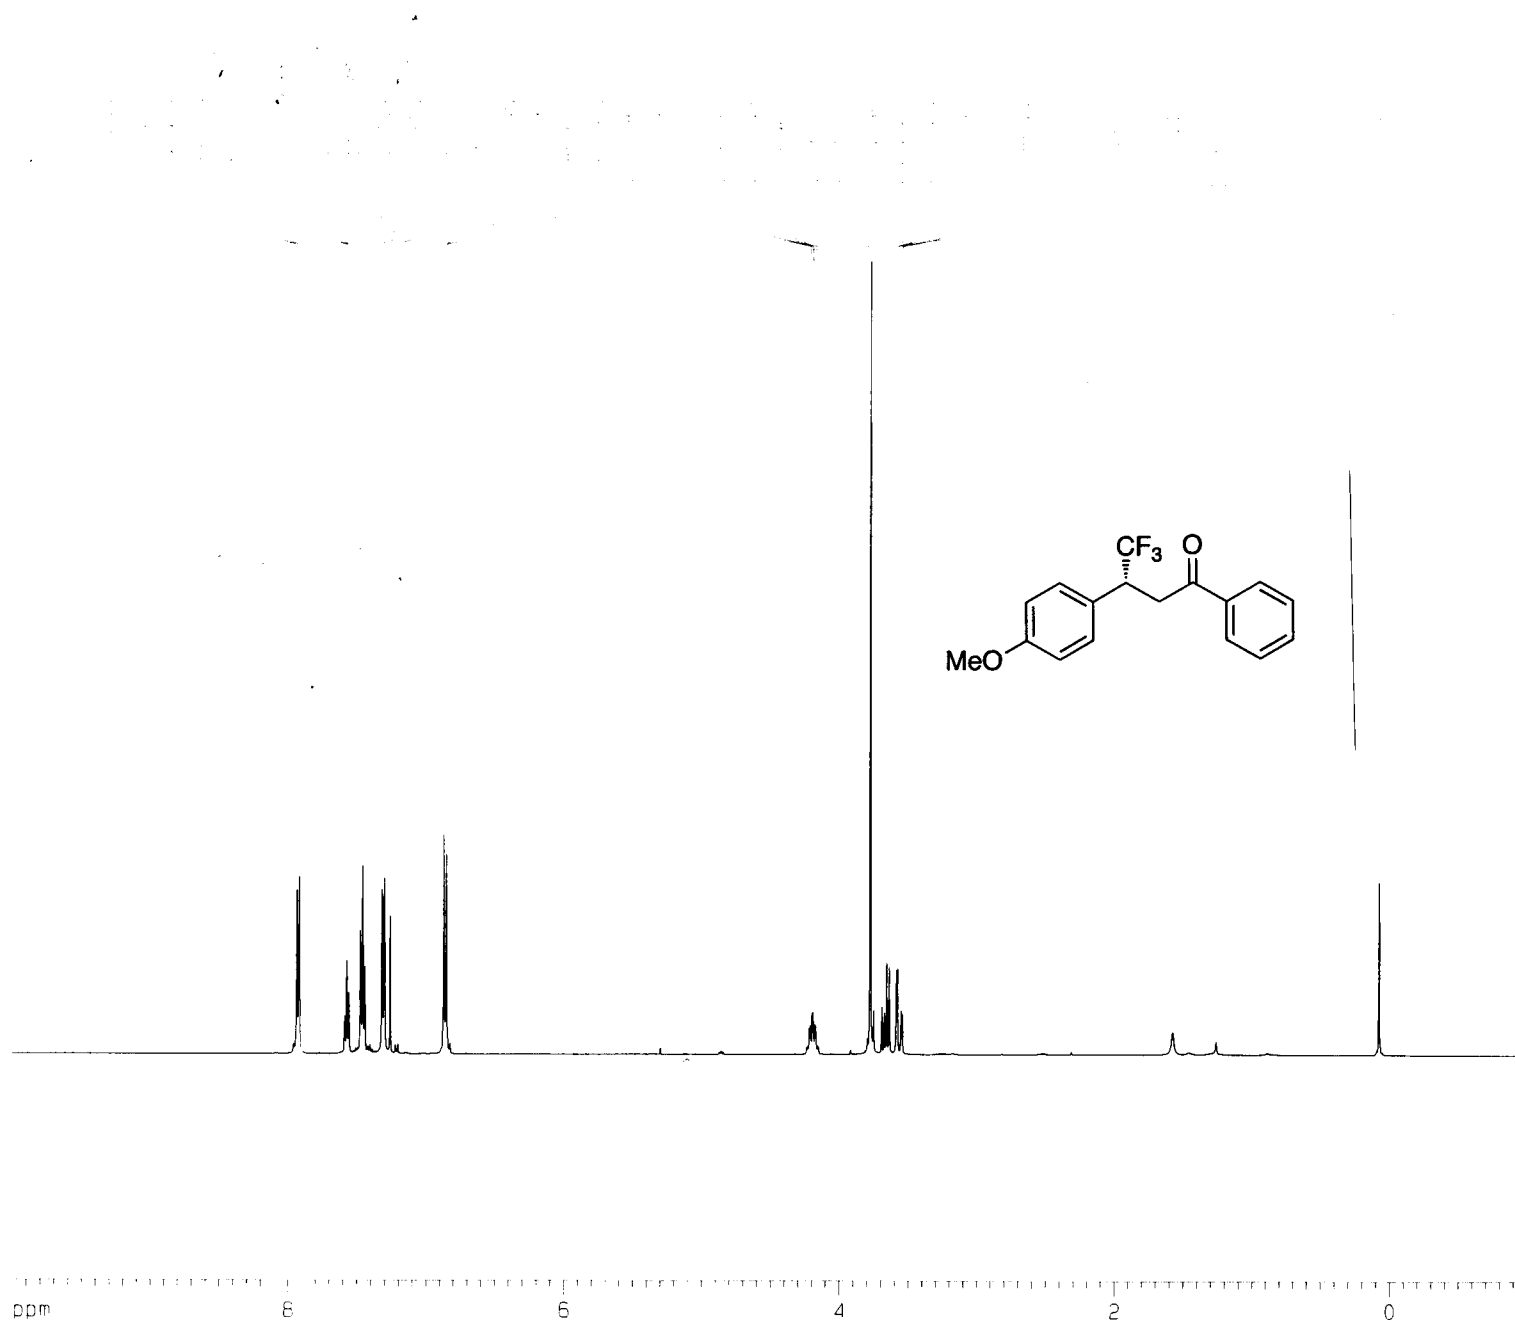

Current Data Parameters  
NAME tanaka-03.11.19  
EXPNO 1  
PROCNO 1

F2 - Acquisition Parameters  
Date\_ 20031119  
Time 17.54  
INSTRUM drx500  
PROBHD 5 mm Multinucl  
PULPROG zg30  
TD 65536  
SOLVENT CDC13  
NS 16  
DS 2  
SWH 10330.578 Hz  
FIDRES 0.157632 Hz  
AQ 3.1719923 sec  
RG 362  
DW 48.400 usec  
DE 6.00 usec  
TE 295.6 K  
D1 1.00000000 sec  
MCREST 0.00000000 sec  
MCWRK 0.01500000 sec

=====  
CHANNEL f1  
NUC1 1H  
P1 10.30 usec  
PL1 -6.00 dB  
SF01 500.1330885 MHz

F2 - Processing parameters  
SI 32768  
SF 500.1300134 MHz  
WDW EM  
SSB 0  
LB 0.30 Hz  
GB 0  
PC 1.00

1D NMR plot parameters  
CX 20.00 cm  
CY 11.54 cm  
F1P 10.000 ppm  
F1 5001.30 Hz  
F2P -1.000 ppm  
F2 -500.13 Hz  
PPMCM 0.55000 ppm/cm  
HZCM 275.07150 Hz/cm

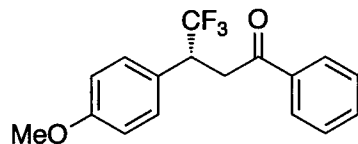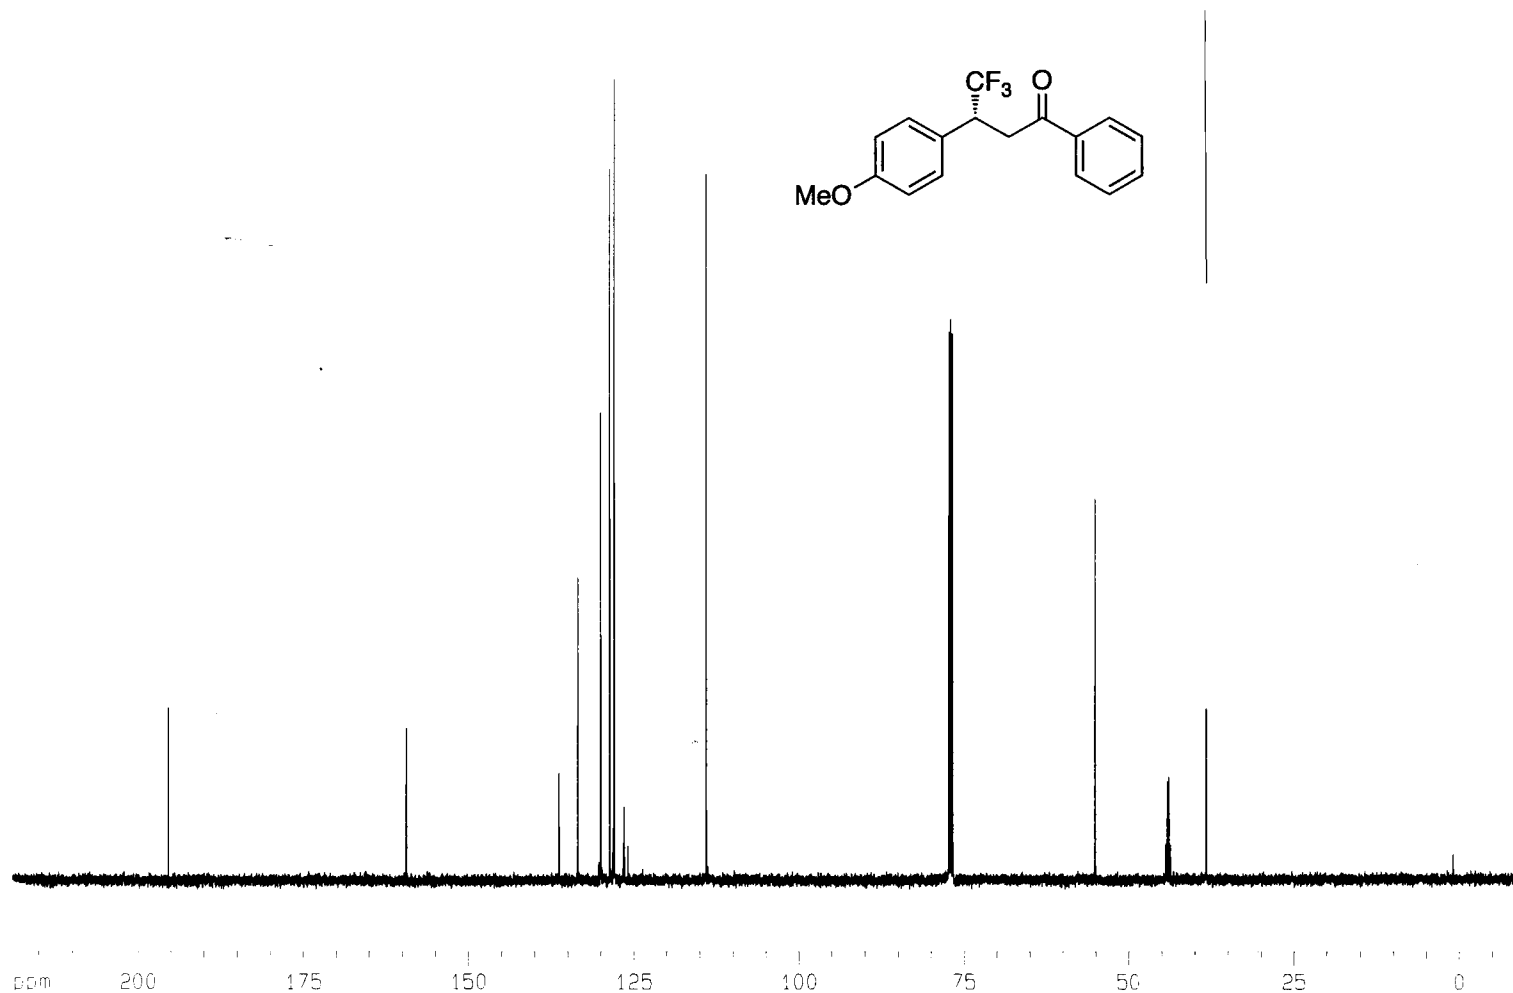

Current Data Parameters  
NAME tanaka-04.6.15-yellow  
EXPNO 1  
PROCNO 1

F2 - Acquisition Parameters  
Date\_ 20040615  
Time 10.45  
INSTRUM drx500  
PROBHD 5 mm Multinuc1  
PULPROG zgpg30  
TD 65536  
SOLVENT CDCl3  
NS 256  
DS 2  
SWH 30030.029 Hz  
FIDRES 0.458222 Hz  
AQ 1.0912244 sec  
RG 3649.1  
DW 16.650 usec  
DE 6.00 usec  
TE 297.8 K  
D1 0.5000000 sec  
d11 0.0300000 sec  
MCREST 0.0000000 sec  
MCWRK 0.0150000 sec

==== CHANNEL f1 =====  
NUC1 13C  
P1 5.70 usec  
PL1 -2.00 dB  
SF01 125.7703643 MHz

==== CHANNEL f2 =====  
CPDPRG2 waitz16  
NUC2 1H  
PCPD2 100.00 usec  
PL2 -6.00 dB  
PL12 13.74 dB  
PL13 13.74 dB  
SF02 500.1320005 MHz

F2 - Processing parameters  
SI 32768  
SF 125.7577951 MHz  
WDW EM  
SSB 0  
LB 1.00 Hz  
GB 0  
PC 1.40

1D NMR plot parameters  
CX 20.00 cm  
CY 10.56 cm  
F1P 219.000 ppm  
F1 27540.96 Hz  
F2P -10.000 ppm  
F2 -1257.58 Hz  
PPMCM 11.45000 ppm/cm  
HZCM 1439.92676 Hz/cm

sample

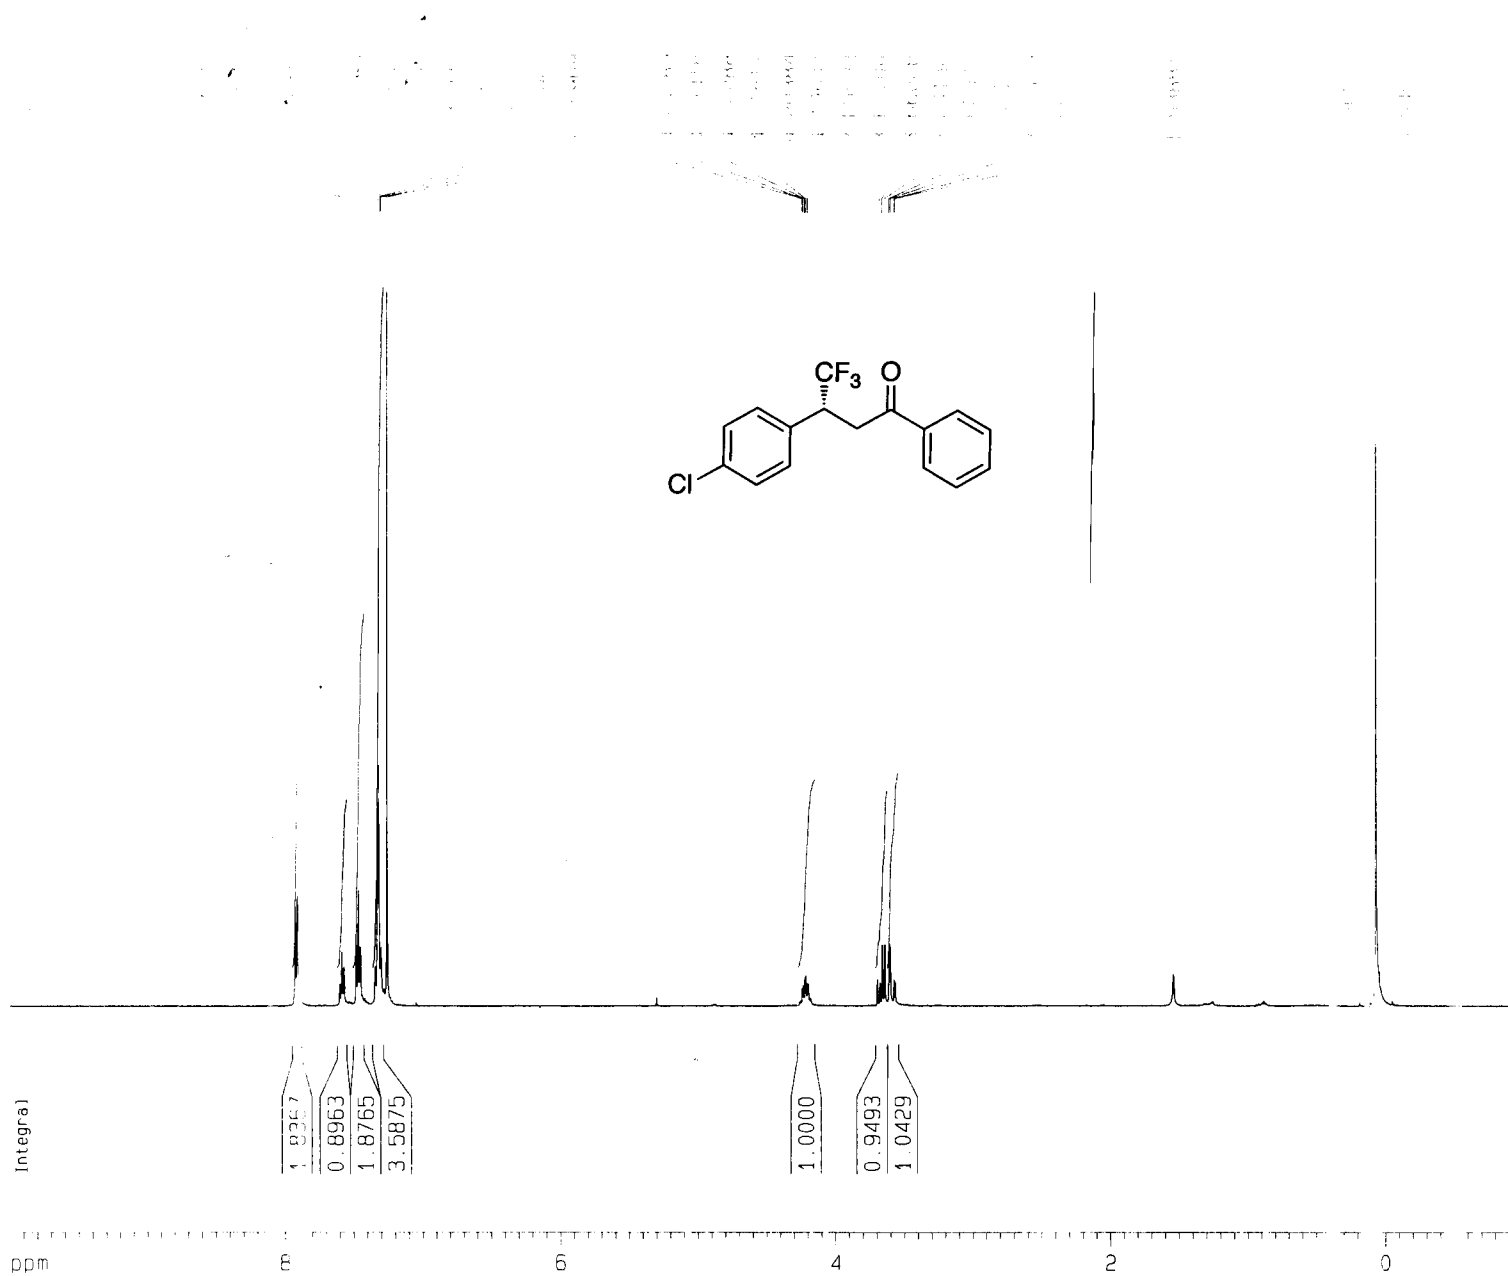

Current Data Parameters

NAME tanaka-p-Cl  
EXPNO 1  
PROCNO 1

F2 - Acquisition Parameters

Date\_ 20040213  
Time 18.30  
INSTRUM orx500  
PROBHD 5 mm Multinucl  
PULPROG zg30  
TD 65536  
SOLVENT CDCl3  
NS 16  
DS 2  
SWH 10330.578 Hz  
FIDRES 0.157632 Hz  
AQ 3.1719923 sec  
RG 912.3  
DW 48.400 usec  
DE 6.00 usec  
TE 295.6 K  
D1 1.00000000 sec  
MCREST 0.00000000 sec  
MCWRK 0.01500000 sec

==== CHANNEL f1 =====

NUC1 1H  
P1 10.30 usec  
PL1 -6.00 dB  
SF01 500.1330885 MHz

F2 - Processing parameters

SI 32768  
SF 500.1300134 MHz  
WDW EM  
SSB 0  
LB 0.30 Hz  
GB 0  
PC 1.00

1D NMR plot parameters

CX 20.00 cm  
CY 10.41 cm  
F1P 10.000 ppm  
F1 5001.30 Hz  
F2P -1.000 ppm  
F2 -500.13 Hz  
PPMCM 0.55000 ppm/cm  
HZCM 275.07150 Hz/cm



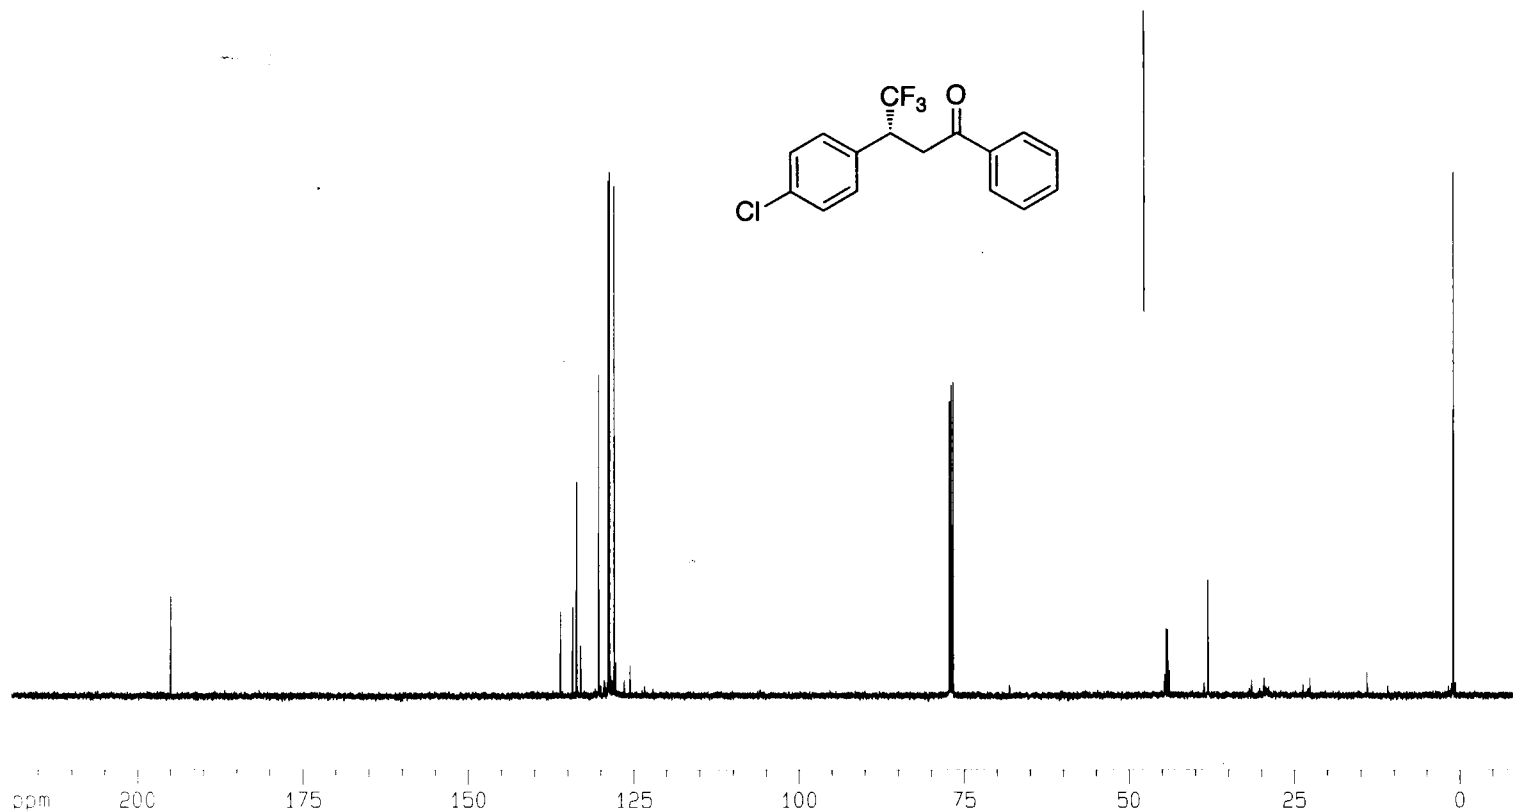

Current Data Parameters  
NAME tanaka-04.5.19-2  
EXPNO 1  
PROCNO 1

F2 - Acquisition Parameters  
Date\_ 20040519  
Time 19.15  
INSTRUM drx500  
PROBHD 5 mm Multinucl  
PULPROG zgpg30  
TD 65536  
SOLVENT CDC13  
NS 256  
DS 2  
SWH 30030.029 Hz  
FIDRES 0.458222 Hz  
AQ 1.0912244 sec  
RG 6502  
DW 16.650 usec  
DE 6.00 usec  
TE 297.5 K  
D1 0.50000000 sec  
d11 0.03000000 sec  
MCREST 0.00000000 sec  
MCWAK 0.01500000 sec

===== CHANNEL f1 =====  
NUC1 13C  
P1 5.70 usec  
PL1 -2.00 dB  
SF01 125.7703643 MHz

===== CHANNEL f2 =====  
CPDPRG2 waltz16  
NUC2 1H  
PCPD2 100.00 usec  
PL2 -6.00 dB  
PL12 13.74 dB  
PL13 13.74 dB  
SF02 500.1320005 MHz

F2 - Processing parameters  
SI 32768  
SF 125.7577951 MHz  
WDW EM  
SSB 0  
LB 1.00 Hz  
GB 0  
PC 1.40

1D NMR plot parameters  
CX 20.00 cm  
CY 6.97 cm  
F1P 219.000 ppm  
F1 27540.96 Hz  
F2P -10.000 ppm  
F2 -1257.58 Hz  
PPMCM 11.45000 ppm/cm  
HZCM 1439.92676 Hz/cm

(P) - Cl

sample

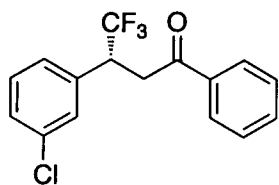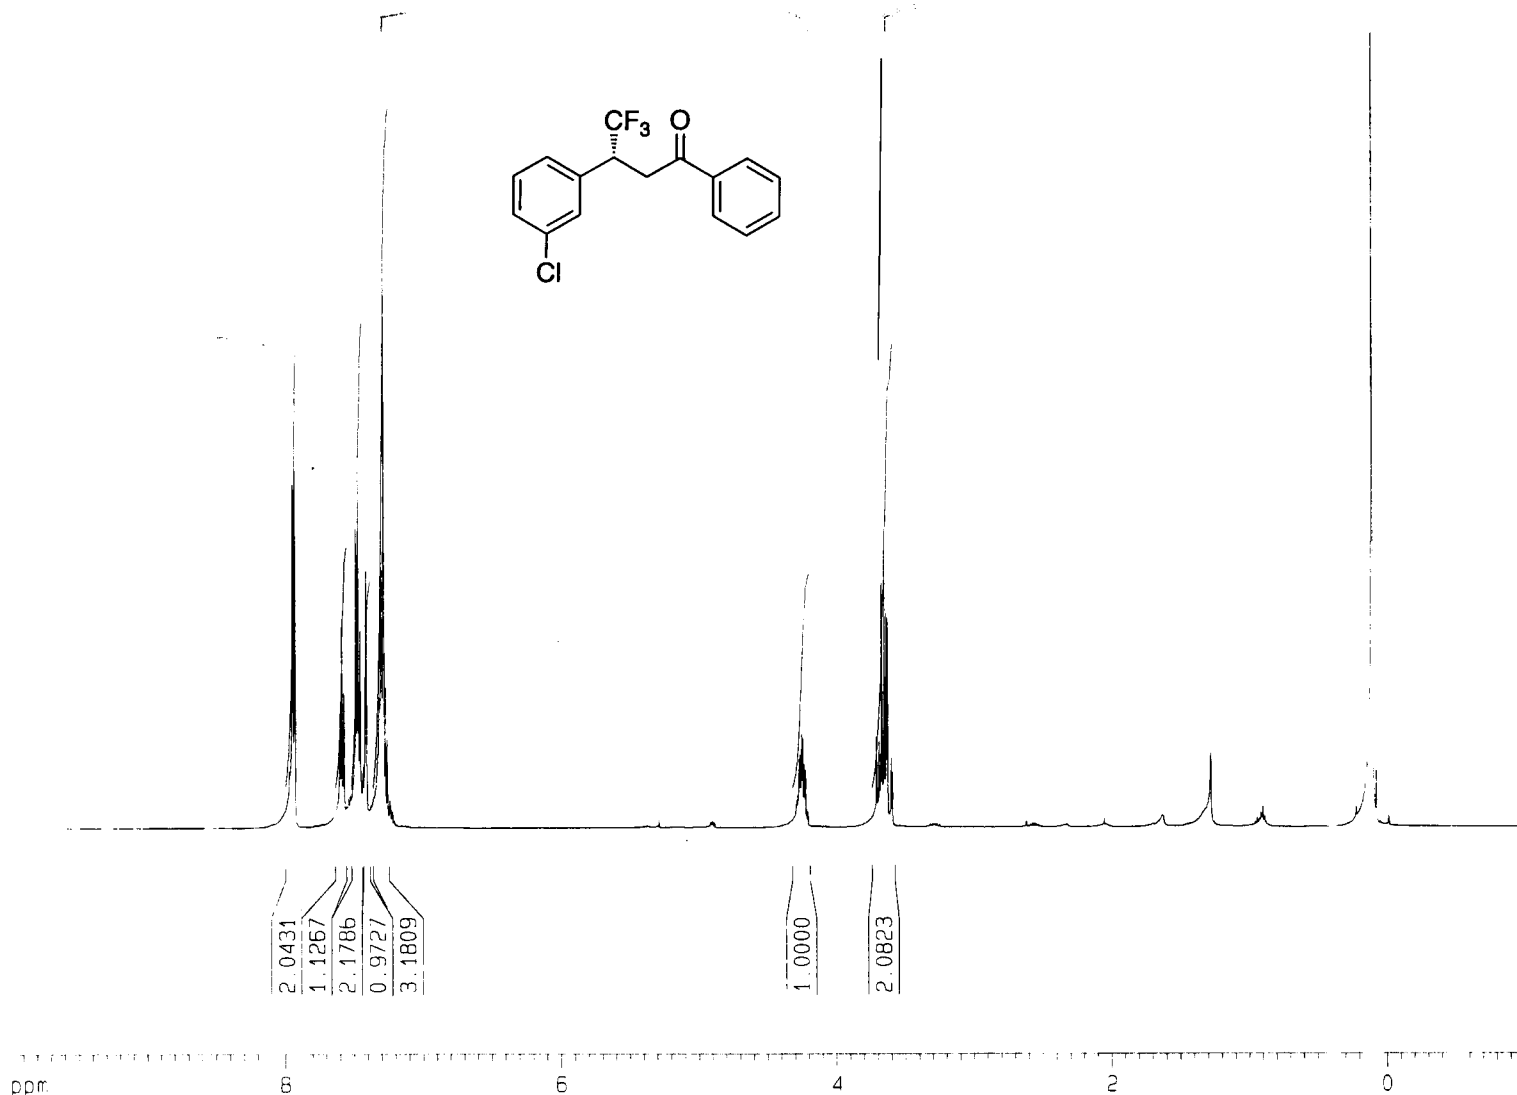

Current Data Parameters  
NAME tanaka-24.4.3-2  
EXPNO 1  
PROCNO 1

F2 - Acquisition Parameters  
Date\_ 20040408  
Time 17 42  
INSTRUM drx500  
PROBHD 5 mm Multinucl  
PULPROG zg30  
TD 65536  
SOLVENT CDCl3  
NS 16  
DS 2  
SFR 10330 573 Hz  
FIDRES 0.157632 Hz  
AQ 3.1713923 sec  
RG 57  
DW 48.400 usec  
DE 6.00 usec  
TE 296.3 K  
D1 1.00000000 sec  
MCREST 0.00000000 sec  
MCARRK 0.01500000 sec

===== CHANNEL f1 =====  
NUC1 1H  
P1 10.50 usec  
PL1 -6.00 dB  
SF01 500.1330885 MHz

F2 - Processing parameters  
SI 32768  
SF 500.1300127 MHz  
WDW EM  
SSB 0  
LB 0.30 Hz  
GB 0  
PC 1.00

1D NMR plot parameters  
CX 20.00 cm  
CY 30.24 cm  
F1P 10.000 ppm  
F1 5001.30 Hz  
F2P -1.000 ppm  
F2 -500.13 Hz  
PPMCM 0.55000 ppm/cm  
HZCM 275.07150 Hz/cm

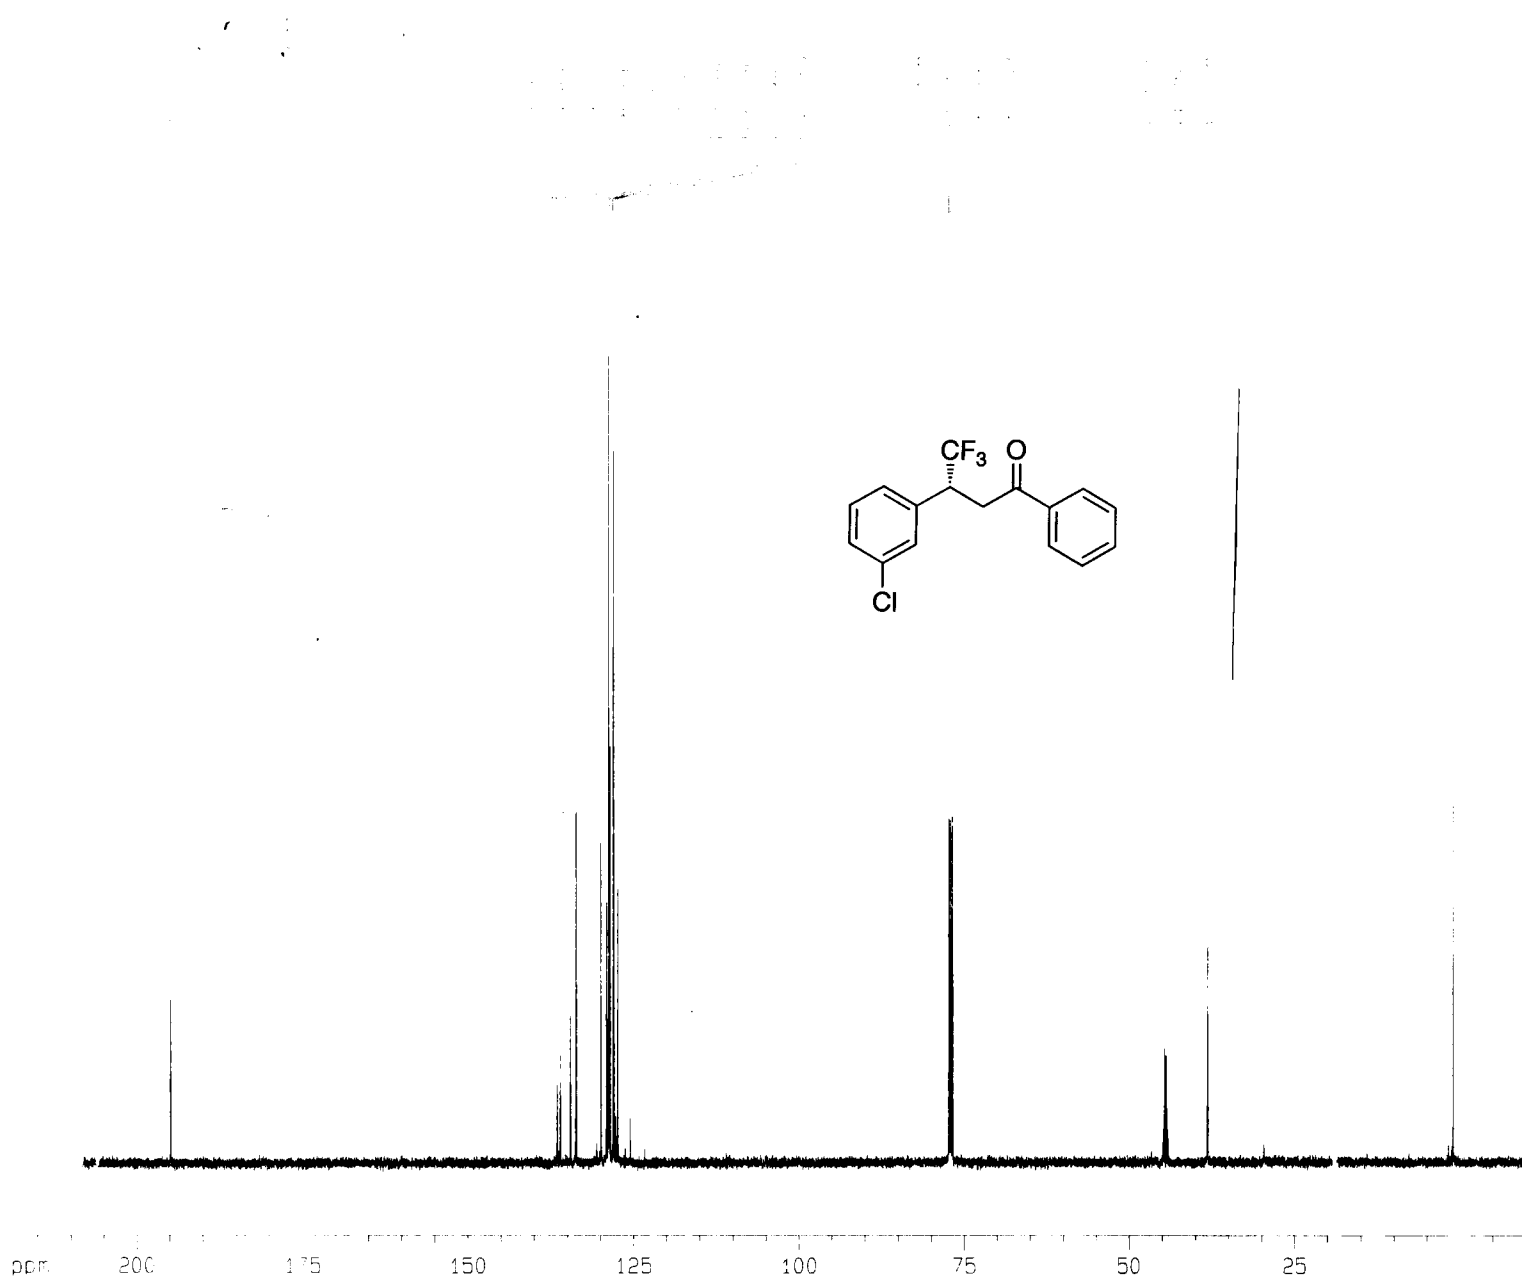

Current Data Parameters  
NAME ts-aka-4.4.8-2  
EXPNO 2  
PROCNO 1

F2 - Acquisition Parameters  
Date\_ 20040408  
Time 17.51  
INSTRUM crx500  
PROBHD 5 mm Multinuc1  
PULPROG zgpg30  
TD 65536  
SOLVENT 40013  
NS 256  
DS 2  
SWH 30030.029 Hz  
FIDRES 0.458222 Hz  
AQ 1.0912244 sec  
RG 3549.1  
DW 15.650 usec  
DE 6.00 usec  
TE 297.3 K  
D1 0.50000000 sec  
d11 0.03000000 sec  
MCREST 0.00000000 sec  
MCWPK 0.01500000 sec

===== CHANNEL f1 =====  
NUC1 13C  
P1 5.70 usec  
PL1 -2.00 dB  
SF01 125.7703643 MHz

===== CHANNEL f2 =====  
CPDPRG2 waltz16  
NUC2 1H  
PCPD2 100.00 usec  
PL2 -6.00 dB  
PL12 13.74 dB  
PL13 13.74 dB  
SF02 500.1320005 MHz

F2 - Processing parameters  
SI 32768  
SF 125.7577969 MHz  
WDW EM  
SSB 0  
LB 1.00 Hz  
GB 0  
PC 0.10

1D NMR plot parameters  
CX 20.00 cm  
CY 10.78 cm  
F1P 219.000 ppm  
F1 27540.96 Hz  
F2P -10.000 ppm  
F2 -1257.58 Hz  
PPMCM 11.45000 ppm/cm  
HZCM 1439.92676 Hz/cm

(m) - Cl

sample

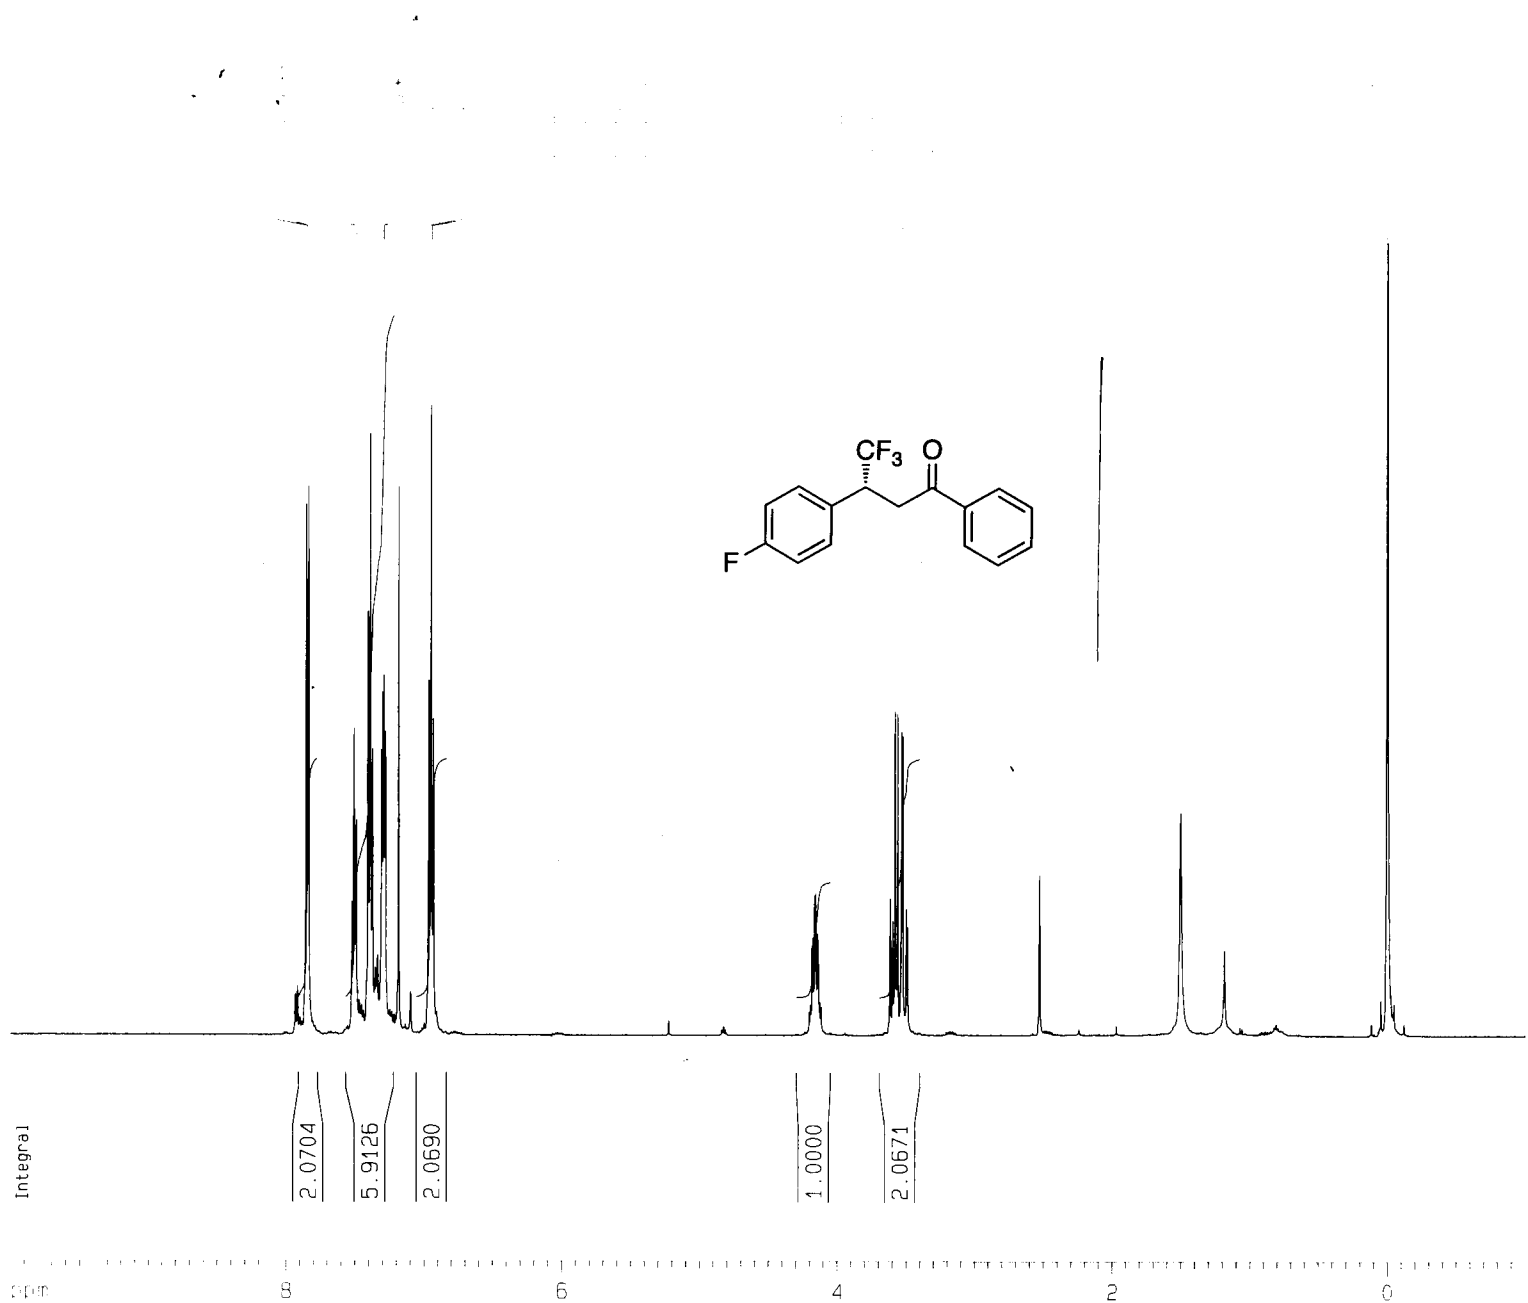

Current Data Parameters  
NAME monof  
EXPNO 1  
PROCNO 1

F2 - Acquisition Parameters  
Date\_ 20040716  
Time 10.46  
INSTRUM drx500  
PROBHD 5 mm Multinucl  
PULPROG zg30  
TD 65536  
SOLVENT CDC13  
NS 16  
DS 2  
SWH 10330.578 Hz  
FIDRES 0.157632 Hz  
AQ 3.1719923 sec  
RG 406.4  
DJW 48.400 usec  
DE 6.00 usec  
TE 298.7 K  
J1 1.00000000 sec  
MCREST 0.00000000 sec  
MCWRK 0.01500000 sec

===== CHANNEL f1 =====  
NUC1 1H  
P1 10.30 usec  
PL1 -6.00 dB  
SF01 500.1330885 MHz

F2 - Processing parameters  
SI 32768  
SF 500.1300512 MHz  
WDW EM  
SSB 0  
LB 0.30 Hz  
GB 0  
PC 1.00

1D NMR plot parameters  
CX 20.00 cm  
CY 34.41 cm  
F1P 10.000 ppm  
F1 5001.30 Hz  
F2P -1.000 ppm  
F2 -500.13 Hz  
PPMCM 0.55000 ppm/cm  
HZCM 275.07153 Hz/cm

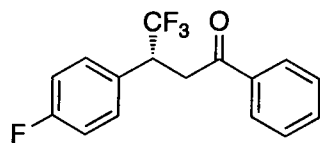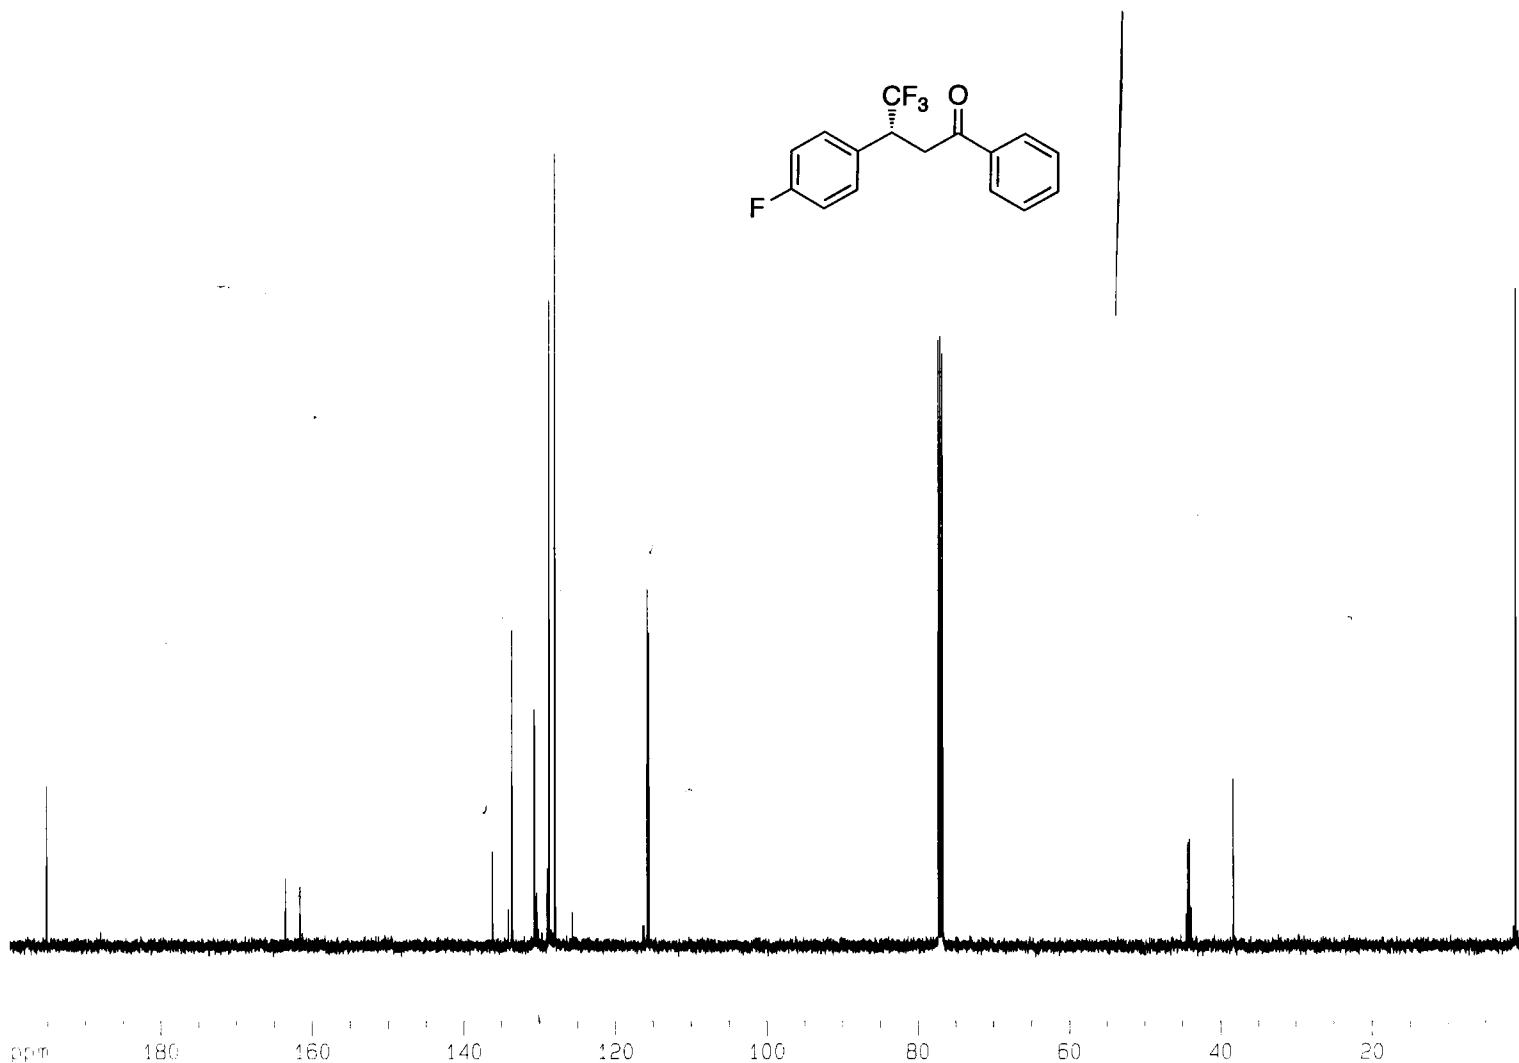

Current Data Parameters  
NAME mono-f2  
EXPNO 2  
PROCNO 1

F2 - Acquisition Parameters  
Date\_ 20040727  
Time 17.39  
INSTRUM drx500  
PROBHD 5 mm Multinucl  
PULPROG zgpg30  
TD 65536  
SOLVENT CDC13  
NS 256  
DS 2  
SWH 30030.029 Hz  
FIDRES 0.458222 Hz  
AQ 1.0912244 sec  
RG 2896.3  
DW 16.650 usec  
DE 6.00 usec  
TE 300.5 K  
D1 0.5000000 sec  
d11 0.0300000 sec  
MCREST 0.0000000 sec  
MCWRK 0.0150000 sec

=====  
CHANNEL f1  
NUC1 13C  
P1 5.70 usec  
PL1 -2.00 dB  
SF01 125.7703643 MHz

=====  
CHANNEL f2  
CPDPRG2 waltz16  
NUC2 1H  
PCPD2 100.00 usec  
PL2 -6.00 dB  
PL12 13.74 dB  
PL13 13.74 dB  
SF02 500.1320005 MHz

F2 - Processing parameters  
SI 32768  
SF 125.7577932 MHz  
WDW EM  
SSB 0  
LB 1.00 Hz  
GB 0  
PC 1.40

1D NMR plot parameters  
CX 20.00 cm  
CY 10.50 cm  
F1P 199.900 ppm  
F1 25138.98 Hz  
F2P -0.100 ppm  
F2 -12.58 Hz  
PPMCM 10.00000 ppm/cm  
HZCM 1257.57788 Hz/cm

sample

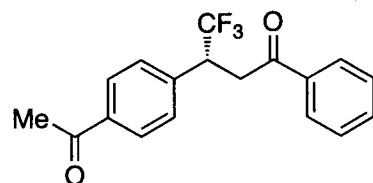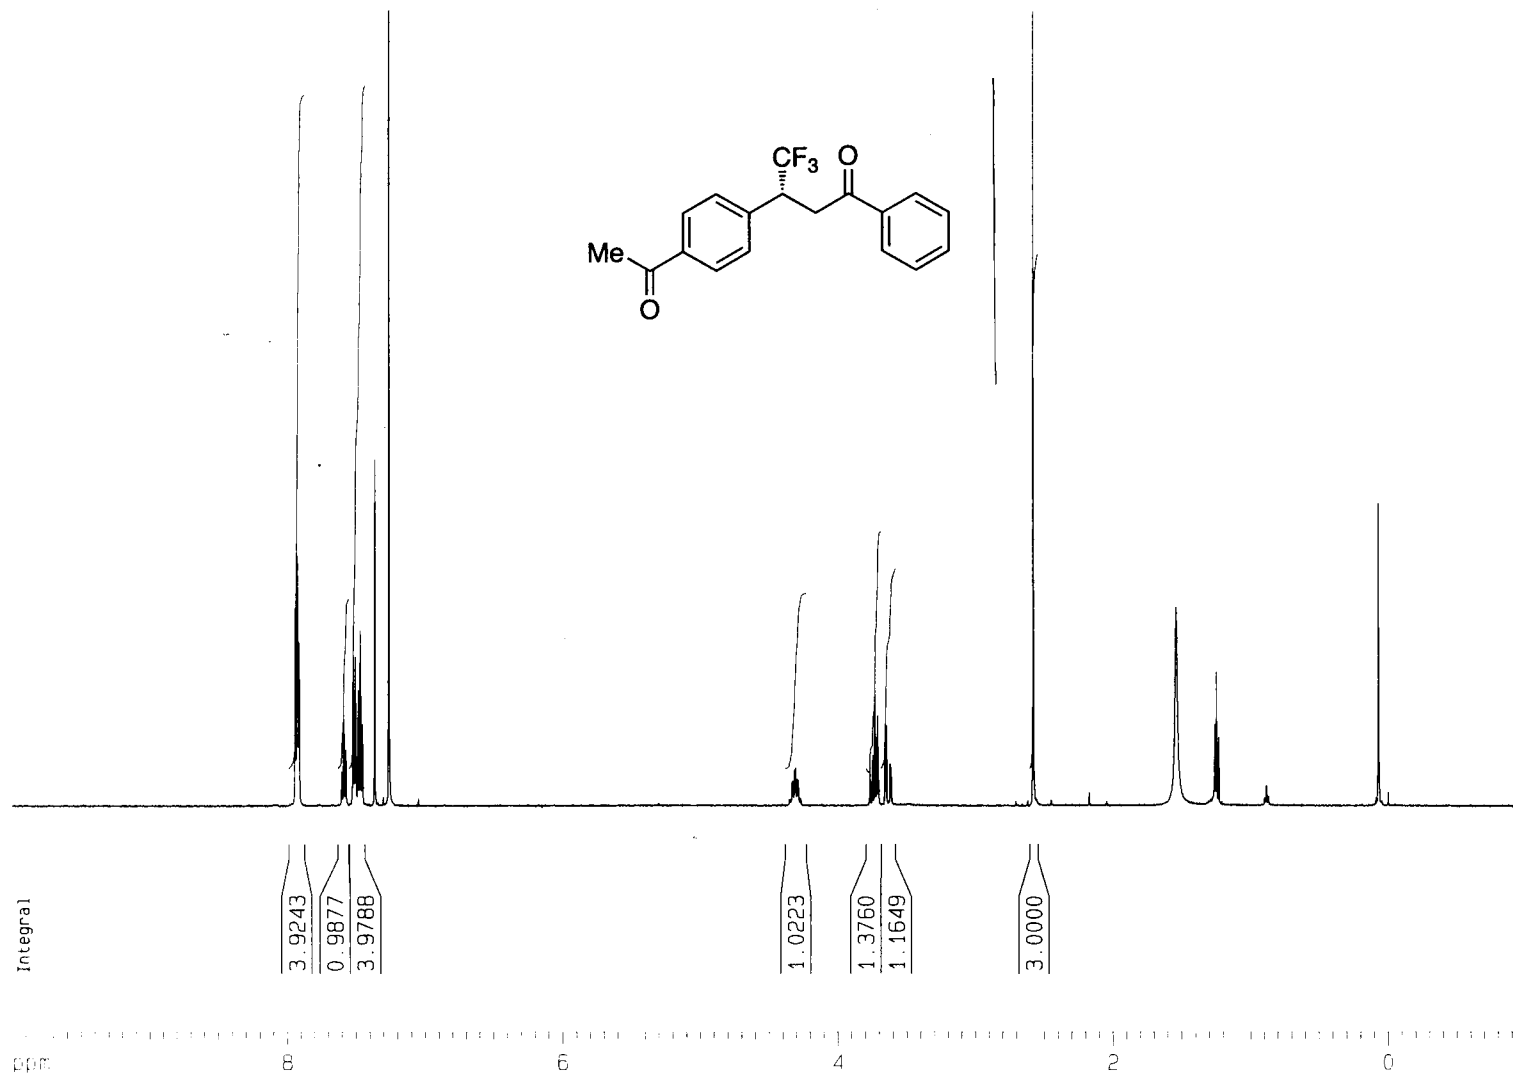

Current Data Parameters  
NAME acetyl  
EXPNO 1  
PROCNO 1

F2 - Acquisition Parameters  
Date\_ 20041210  
Time 14.03  
INSTRUM drx500  
PROBHD 5 mm Multinucl  
PULPROG zg30  
TD 65536  
SOLVENT CDCl3  
NS 16  
DS 2  
SWH 10330.578 Hz  
FIDRES 0.157632 Hz  
AQ 3.1719923 sec  
RG 1149.4  
DW 48.400 usec  
DE 6.00 usec  
TE 297.6 K  
D1 1.00000000 sec  
MCREST 0.00000000 sec  
MCWRK 0.01500000 sec

==== CHANNEL f1 =====  
NUC1 1H  
P1 10.30 usec  
PL1 -6.00 dB  
SF01 500.1330885 MHz

F2 - Processing parameters  
SI 32768  
SF 500.1300129 MHz  
WDW EM  
SSB 0  
LB 0.30 Hz  
GB 0  
PC 1.00

1D NMR plot parameters  
CX 20.00 cm  
CY 12.50 cm  
F1P 10.000 ppm  
F1 5001.30 Hz  
F2P -1.000 ppm  
F2 -500.13 Hz  
PPMCM 0.55000 ppm/cm  
HZCM 275.07150 Hz/cm

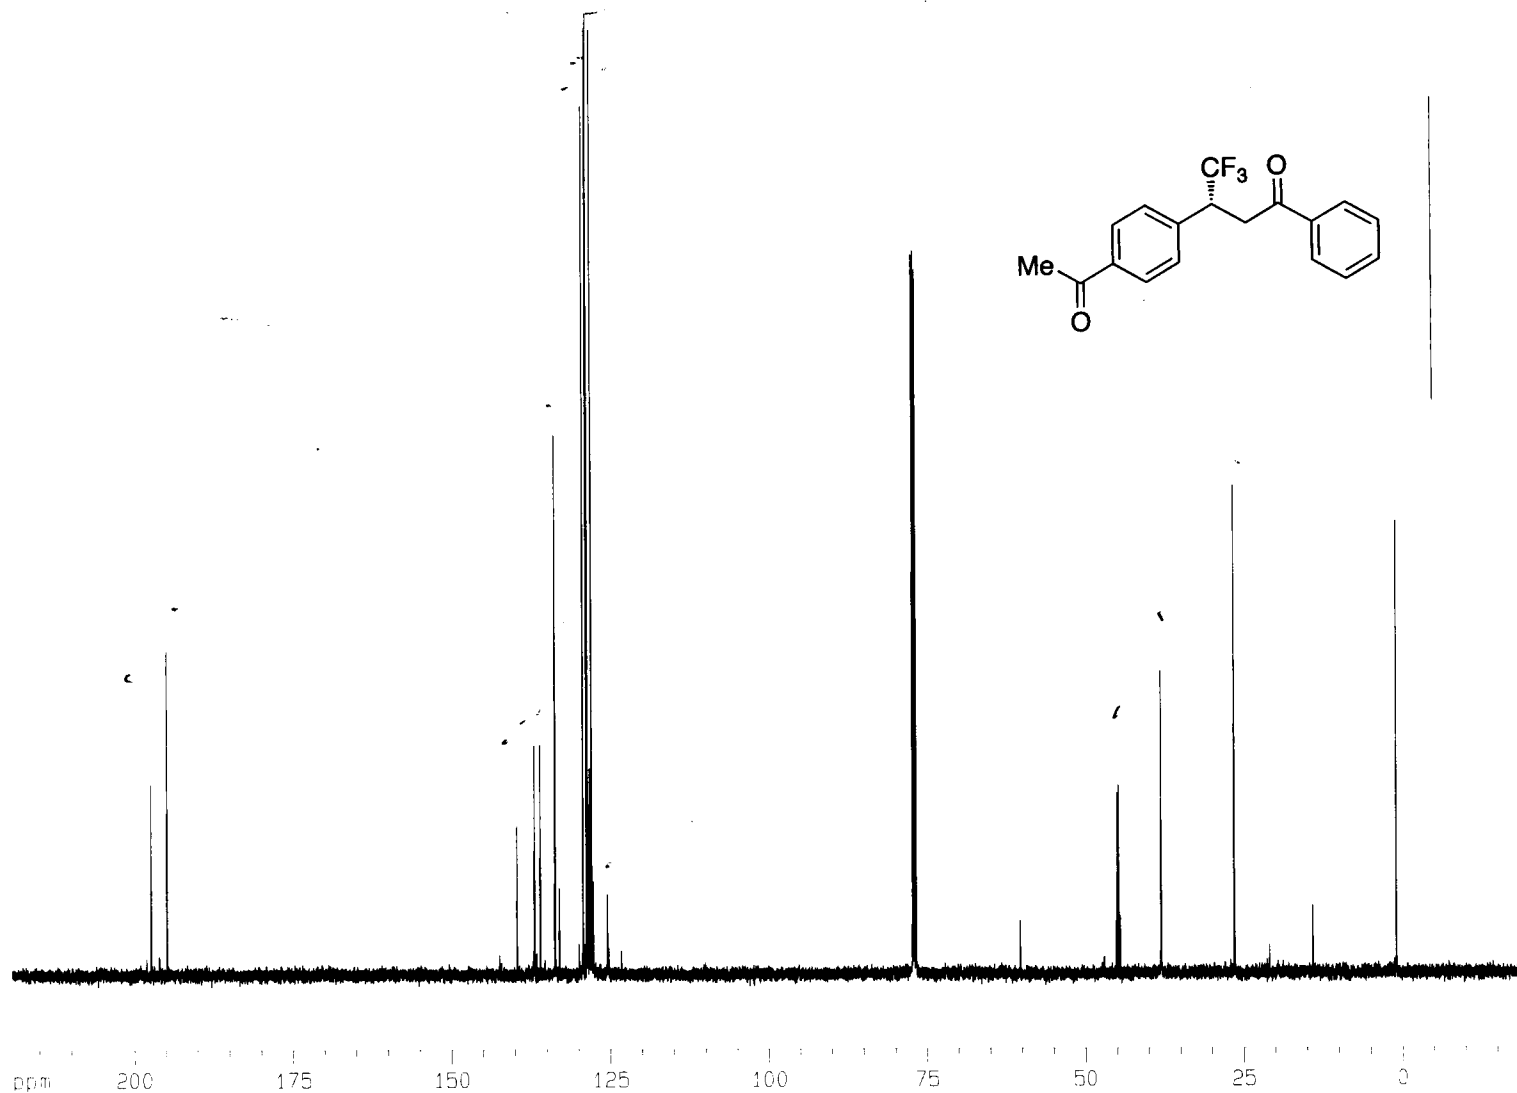

Current Data Parameters

NAME acetyl-1  
EXPNO 2  
PROCNO 1

F2 - Acquisition Parameters

Date\_ 20041014  
Time 19.37  
INSTRUM drx500  
PROBHD 5 mm Multinuc1  
PULPROG zgpg30  
TD 65536  
SOLVENT CDC13  
NS 256  
DS 2  
SWH 30030.029 Hz  
FIDRES 0.458222 Hz  
AQ 1.0912244 sec  
RG 5160.6  
DW 16.650 usec  
DE 6.00 usec  
TE 298.2 K  
D1 0.50000000 sec  
d11 0.03000000 sec  
MCREST 0.00000000 sec  
MCWAK 0.01500000 sec

==== CHANNEL f1 =====

NUC1 13C  
P1 5.70 usec  
PL1 -2.00 dB  
SF01 125.7703643 MHz

==== CHANNEL f2 =====

CPDPRG2 waltz16  
NUC2 1H  
PCPD2 100.00 usec  
PL2 -6.00 dB  
PL12 13.74 dB  
PL13 13.74 dB  
SF02 500.1320005 MHz

F2 - Processing parameters

SI 32768  
SF 125.7577997 MHz  
WDW EM  
SSB 0  
LB 1.00 Hz  
GB 0  
PC 1.40

1D NMR plot parameters

CX 20.00 cm  
CY 17.10 cm  
F1P 219.308 ppm  
F1 27579.66 Hz  
F2P -19.485 ppm  
F2 -2450.37 Hz  
PPMCM 11.93963 ppm/cm  
HZCM 1501.50159 Hz/cm

sample

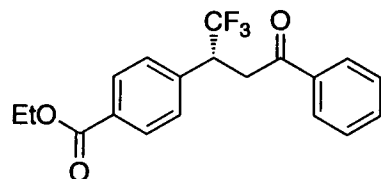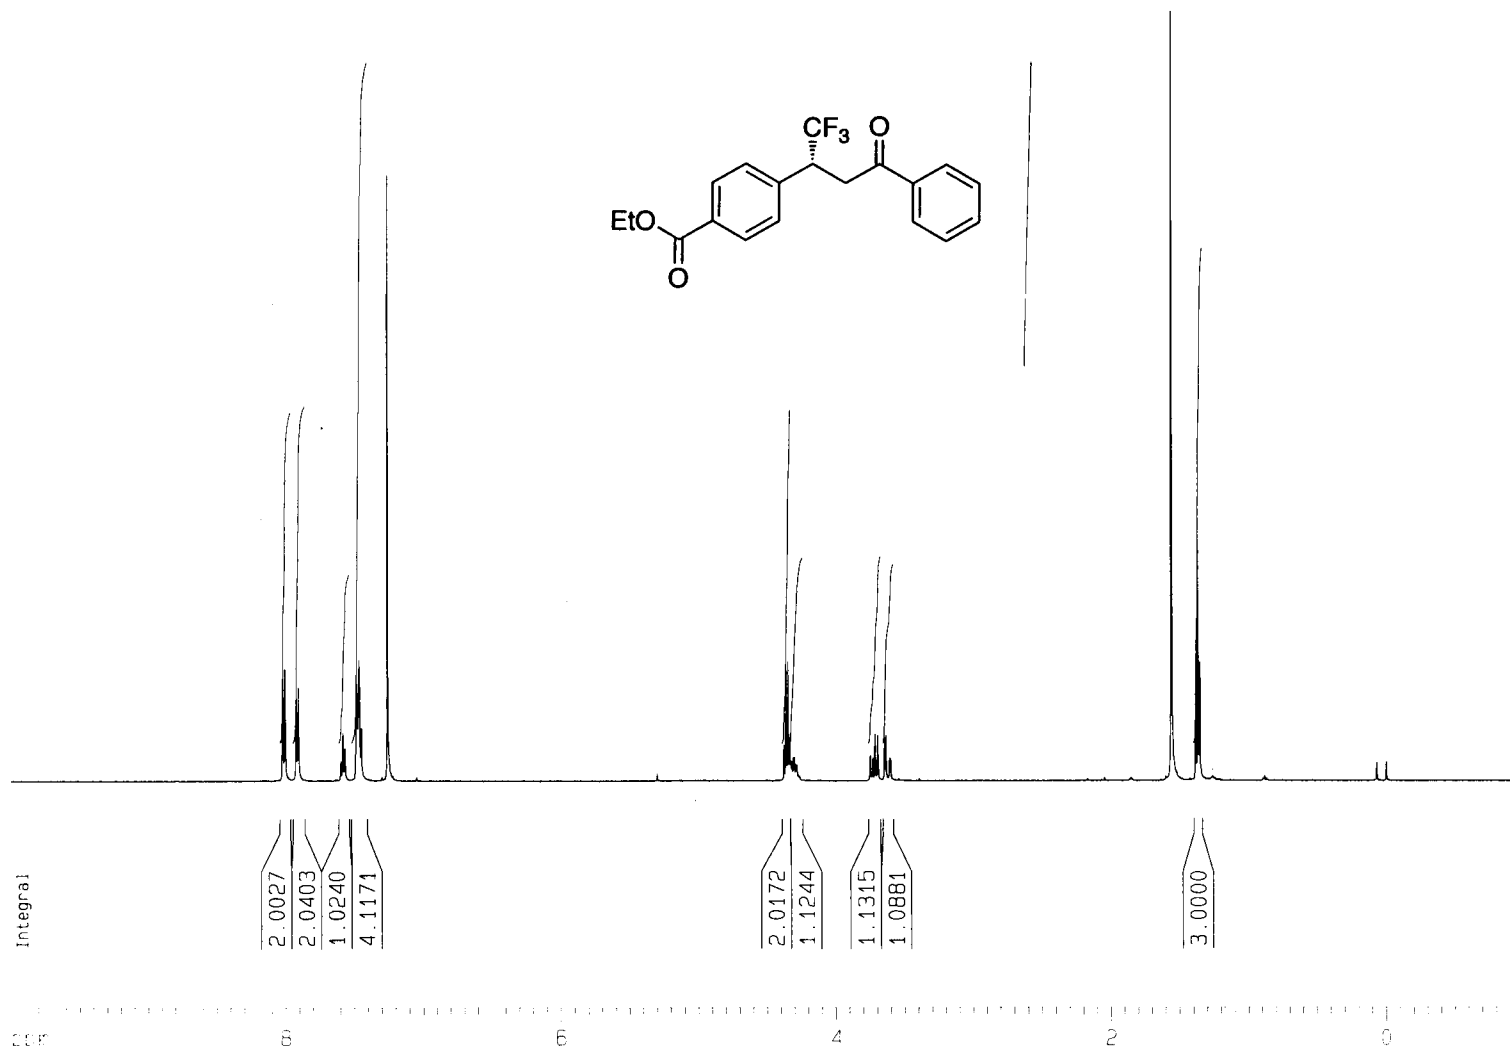

Current Data Parameters  
NAME tanaka-04.6.2  
EXPNO 1  
PROCNO 1

F2 - Acquisition Parameters  
Date\_ 20040602  
Time 9.13  
INSTRUM drx500  
PROBHD 5 mm Multinucl  
PULPROG zg30  
TD 65536  
SOLVENT CDCl3  
NS 16  
DS 2  
SWH 10330.578 Hz  
FIDRES 0.157632 Hz  
AQ 3.1719923 sec  
RG 1024  
DW 48.400 usec  
DE 6.00 usec  
TE 296.8 K  
D1 1.0000000 sec  
MCREST 0.0000000 sec  
MCWRK 0.0150000 sec

==== CHANNEL f1 =====  
NUC1 1H  
P1 10.30 usec  
PL1 -6.00 dB  
SFO1 500.1330885 MHz

F2 - Processing parameters  
SI 32768  
SF 500.1300134 MHz  
WDW EM  
SSB 0  
LB 0.30 Hz  
GB 0  
PC 1.00

1D NMR plot parameters  
CX 20.00 cm  
CY 10.26 cm  
F1P 10.000 ppm  
F1 5001.30 Hz  
F2P -1.000 ppm  
F2 -500.13 Hz  
PMCM 0.55000 ppm/cm  
HZCM 275.07150 Hz/cm



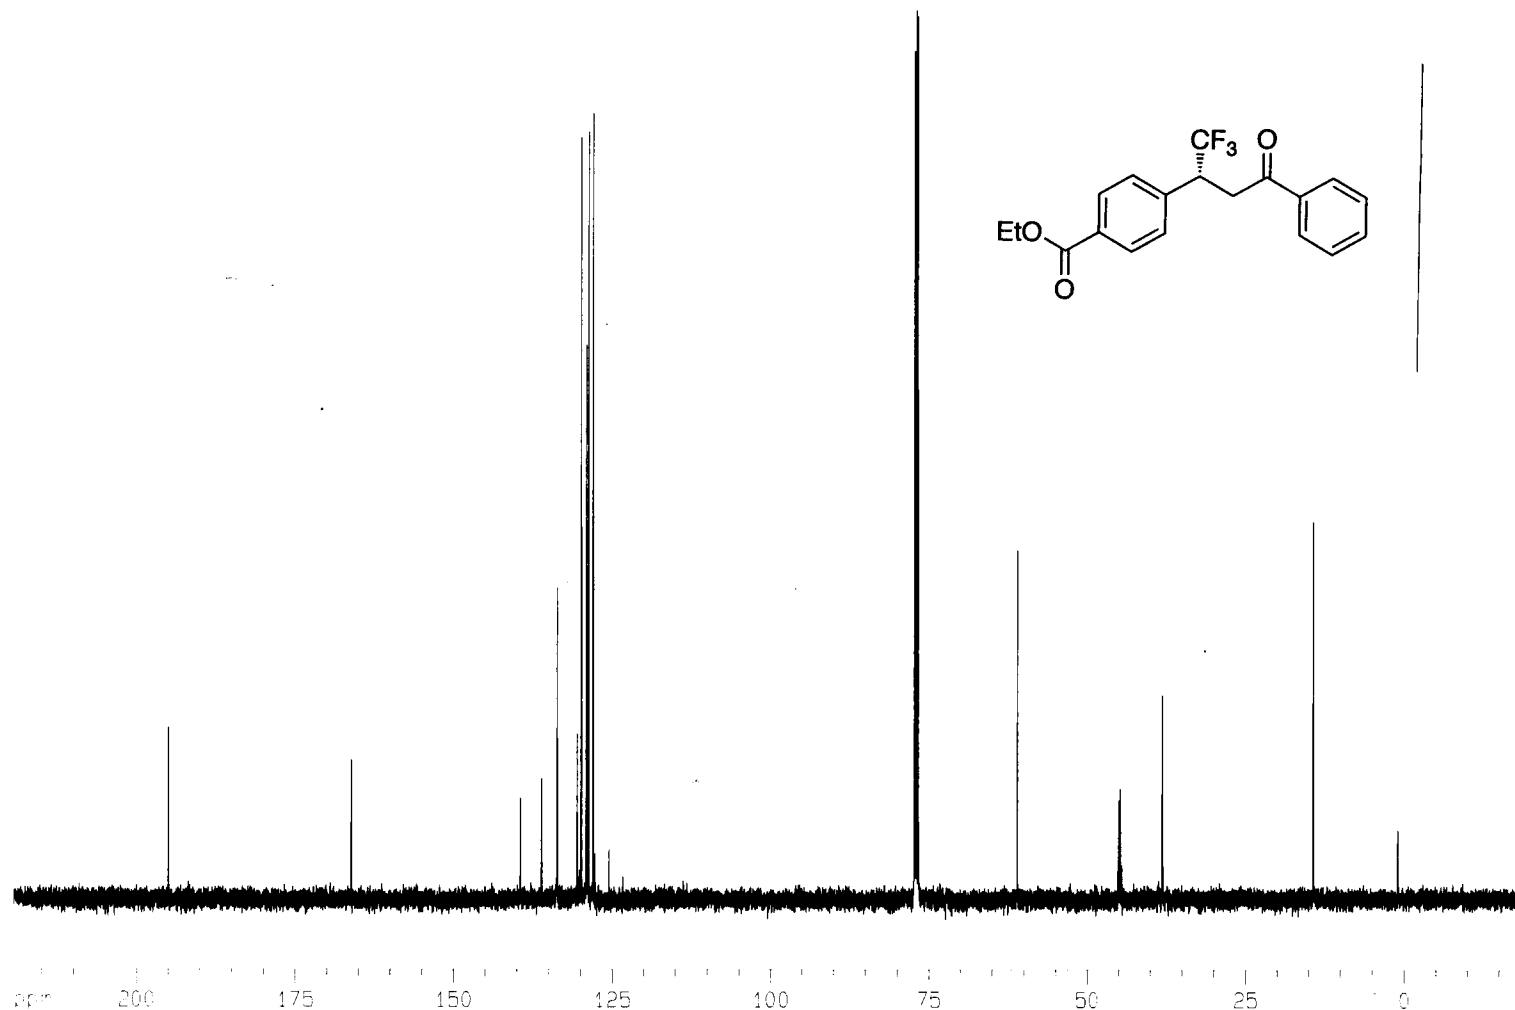

Current Data Parameters  
NAME ethoxycarbonyl  
EXPNO 2  
PROCNO 1

F2 - Acquisition Parameters  
Date\_ 20040831  
Time 17.58  
INSTRUM drx500  
PROBHD 5 mm Multinucl  
PULPROG zgpg30  
TD 65536  
SOLVENT CDCl3  
NS 256  
DS 2  
SWH 30030.029 Hz  
FIDRES 0.458222 Hz  
AQ 1.0912244 sec  
RG 3649.1  
DW 16.650 usec  
DE 6.00 usec  
TE 299.7 K  
D1 0.50000000 sec  
d11 0.03000000 sec  
MCREST 0.00000000 sec  
MCWPK 0.01500000 sec

===== CHANNEL f1 =====  
NUC1 13C  
P1 5.70 usec  
PL1 -2.00 dB  
SF01 125.7703643 MHz

===== CHANNEL f2 =====  
CPDPRG2 waltz16  
NUC2 1H  
PCPD2 100.00 usec  
PL2 -6.00 dB  
PL12 13.74 dB  
PL13 13.74 dB  
SF02 500.1320005 MHz

F2 - Processing parameters  
SI 32768  
SF 125.7577932 MHz  
WDW EM  
SSB 0  
LB 1.00 Hz  
GB 0  
PC 1.40

1D NMR plot parameters  
CX 20.00 cm  
CY 11.98 cm  
F1P 219.359 ppm  
F1 27586.10 Hz  
F2P -19.434 ppm  
F2 -2443.93 Hz  
PPMCM 11.93963 ppm/cm  
HZCM 1501.50146 Hz/cm

sample

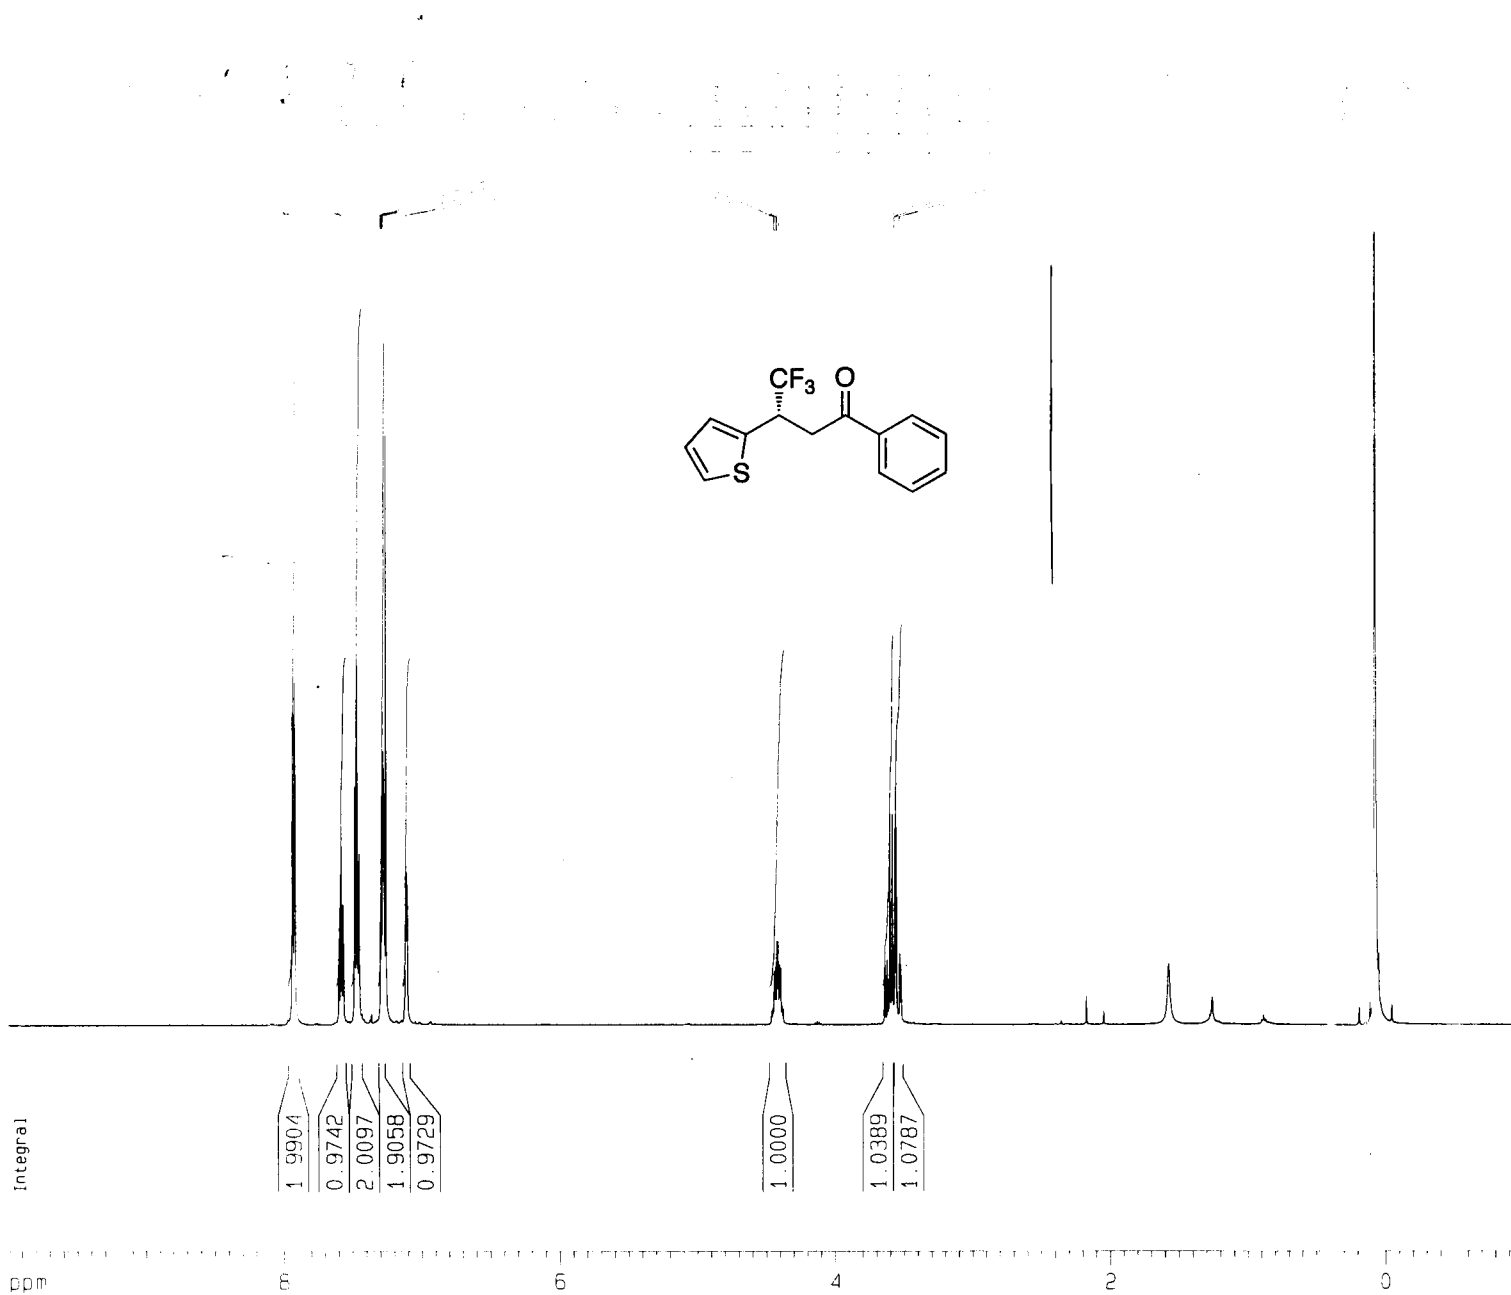

Current Data Parameters  
NAME taraks-112  
EXPNO 1  
PROCNO 1

F2 - Acquisition Parameters  
Date\_ 20040212  
Time 17.22  
INSTRUM anx500  
PROBHD 5 mm Multinucl  
PULPROG zg30  
TD 65536  
SOLVENT CDCl3  
NS 16  
DS 2  
SWH 10330.578 Hz  
FIDRES 0.157632 Hz  
AQ 3.1719923 sec  
RG 456.1  
DQ 48.400 usec  
DE 6.00 usec  
TE 295.8 K  
D1 1.00000000 sec  
MCREST 0.00000000 sec  
MCWRK 0.01500000 sec

===== CHANNEL f1 =====  
NUC1 1H  
P1 10.30 usec  
PL1 -6.00 dB  
SF01 500.1330885 MHz

F2 - Processing parameters  
SI 32768  
SF 500.1300131 MHz  
WDW EM  
SSB 0  
LB 0.30 Hz  
GB 0  
PC 1.00

1D NMR plot parameters  
CX 20.00 cm  
CY 50.62 cm  
F1P 10.000 ppm  
F1 5001.30 Hz  
F2P -1.000 ppm  
F2 -500.13 Hz  
PPMCM 0.55000 ppm/cm  
HZCM 275.07150 Hz/cm

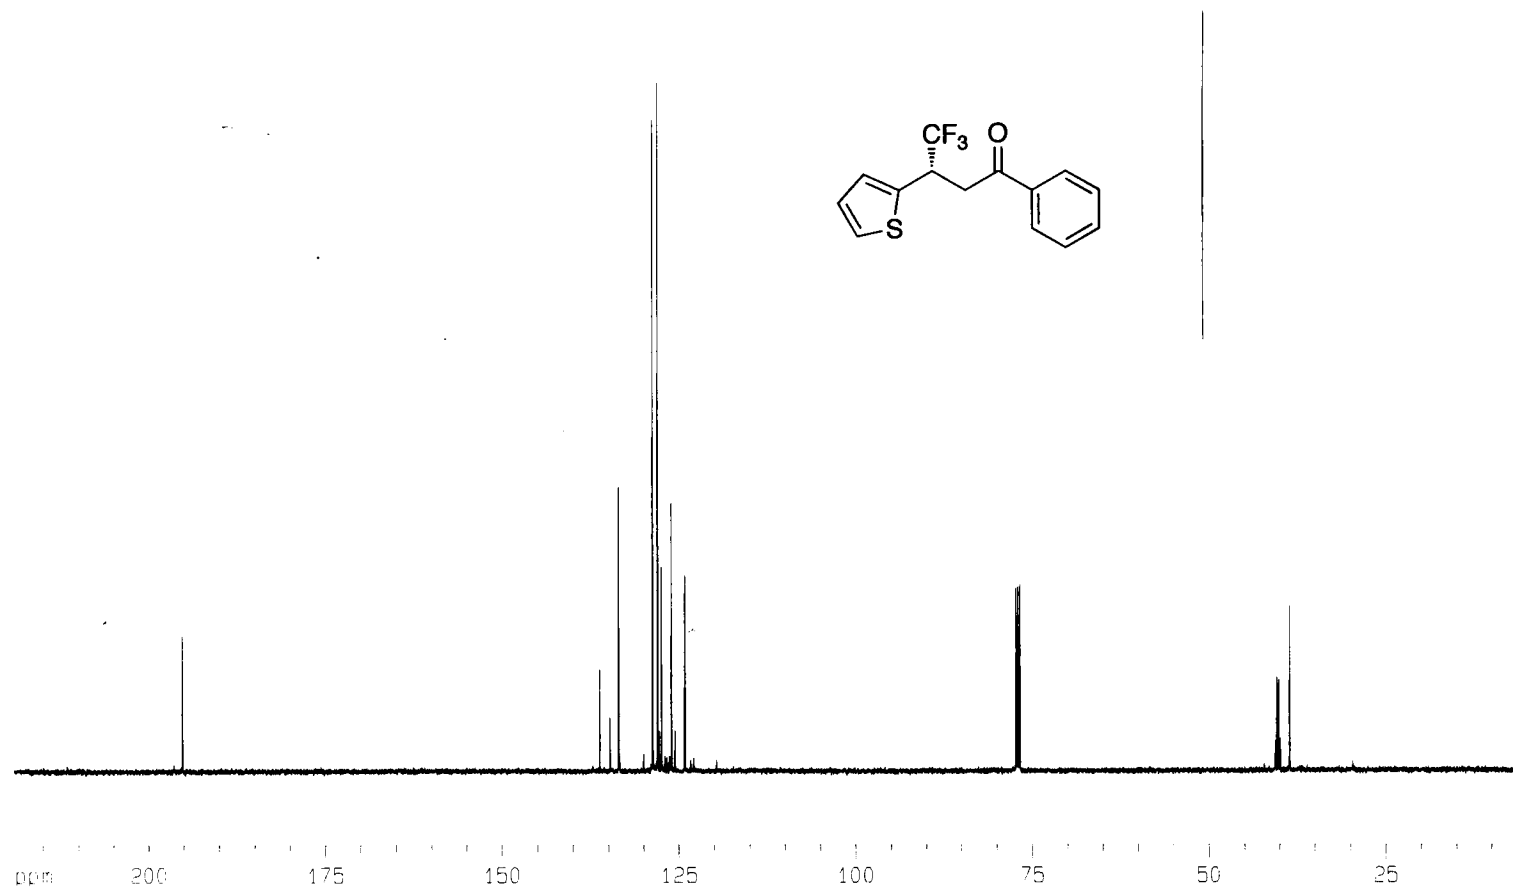

Current Data Parameters  
NAME tanaka-04.6.17  
EXPNO 2  
PROCNO 1

F2 - Acquisition Parameters  
Date\_ 20040617  
Time 9.59  
INSTRUM drx500  
PROBHD 5 mm Multinuc1  
PULPROG zgpg30  
TD 65536  
SOLVENT CDCl3  
NS 256  
DS 2  
SWH 30030.029 Hz  
FIDRES 0.458222 Hz  
AQ 1.0912244 sec  
RG 3649.1  
DW 16.650 usec  
DE 6.00 usec  
TE 298.0 K  
D1 0.50000000 sec  
d11 0.03000000 sec  
MCREST 0.00000000 sec  
MCWRK 0.01500000 sec

==== CHANNEL f1 =====  
NUC1 13C  
P1 5.70 usec  
PL1 -2.00 dB  
SF01 125.7703643 MHz

==== CHANNEL f2 =====  
CPDPRG2 waltz16  
NUC2 1H  
PCPD2 100.00 usec  
PL2 -5.00 dB  
PL12 13.74 dB  
PL13 13.74 dB  
SF02 500.1320005 MHz

F2 - Processing parameters  
SI 32768  
SF 125.7577978 MHz  
WDW EM  
SSB 0  
LB 1.00 Hz  
GB 0  
PC 1.40

1D NMR plot parameters  
CX 20.00 cm  
CY 12.68 cm  
F1P 219.000 ppm  
F1 27540.96 Hz  
F2P 5.000 ppm  
F2 628.79 Hz  
PPMCM 10.70000 ppm/cm  
HZCM 1345.60840 Hz/cm

Page 10

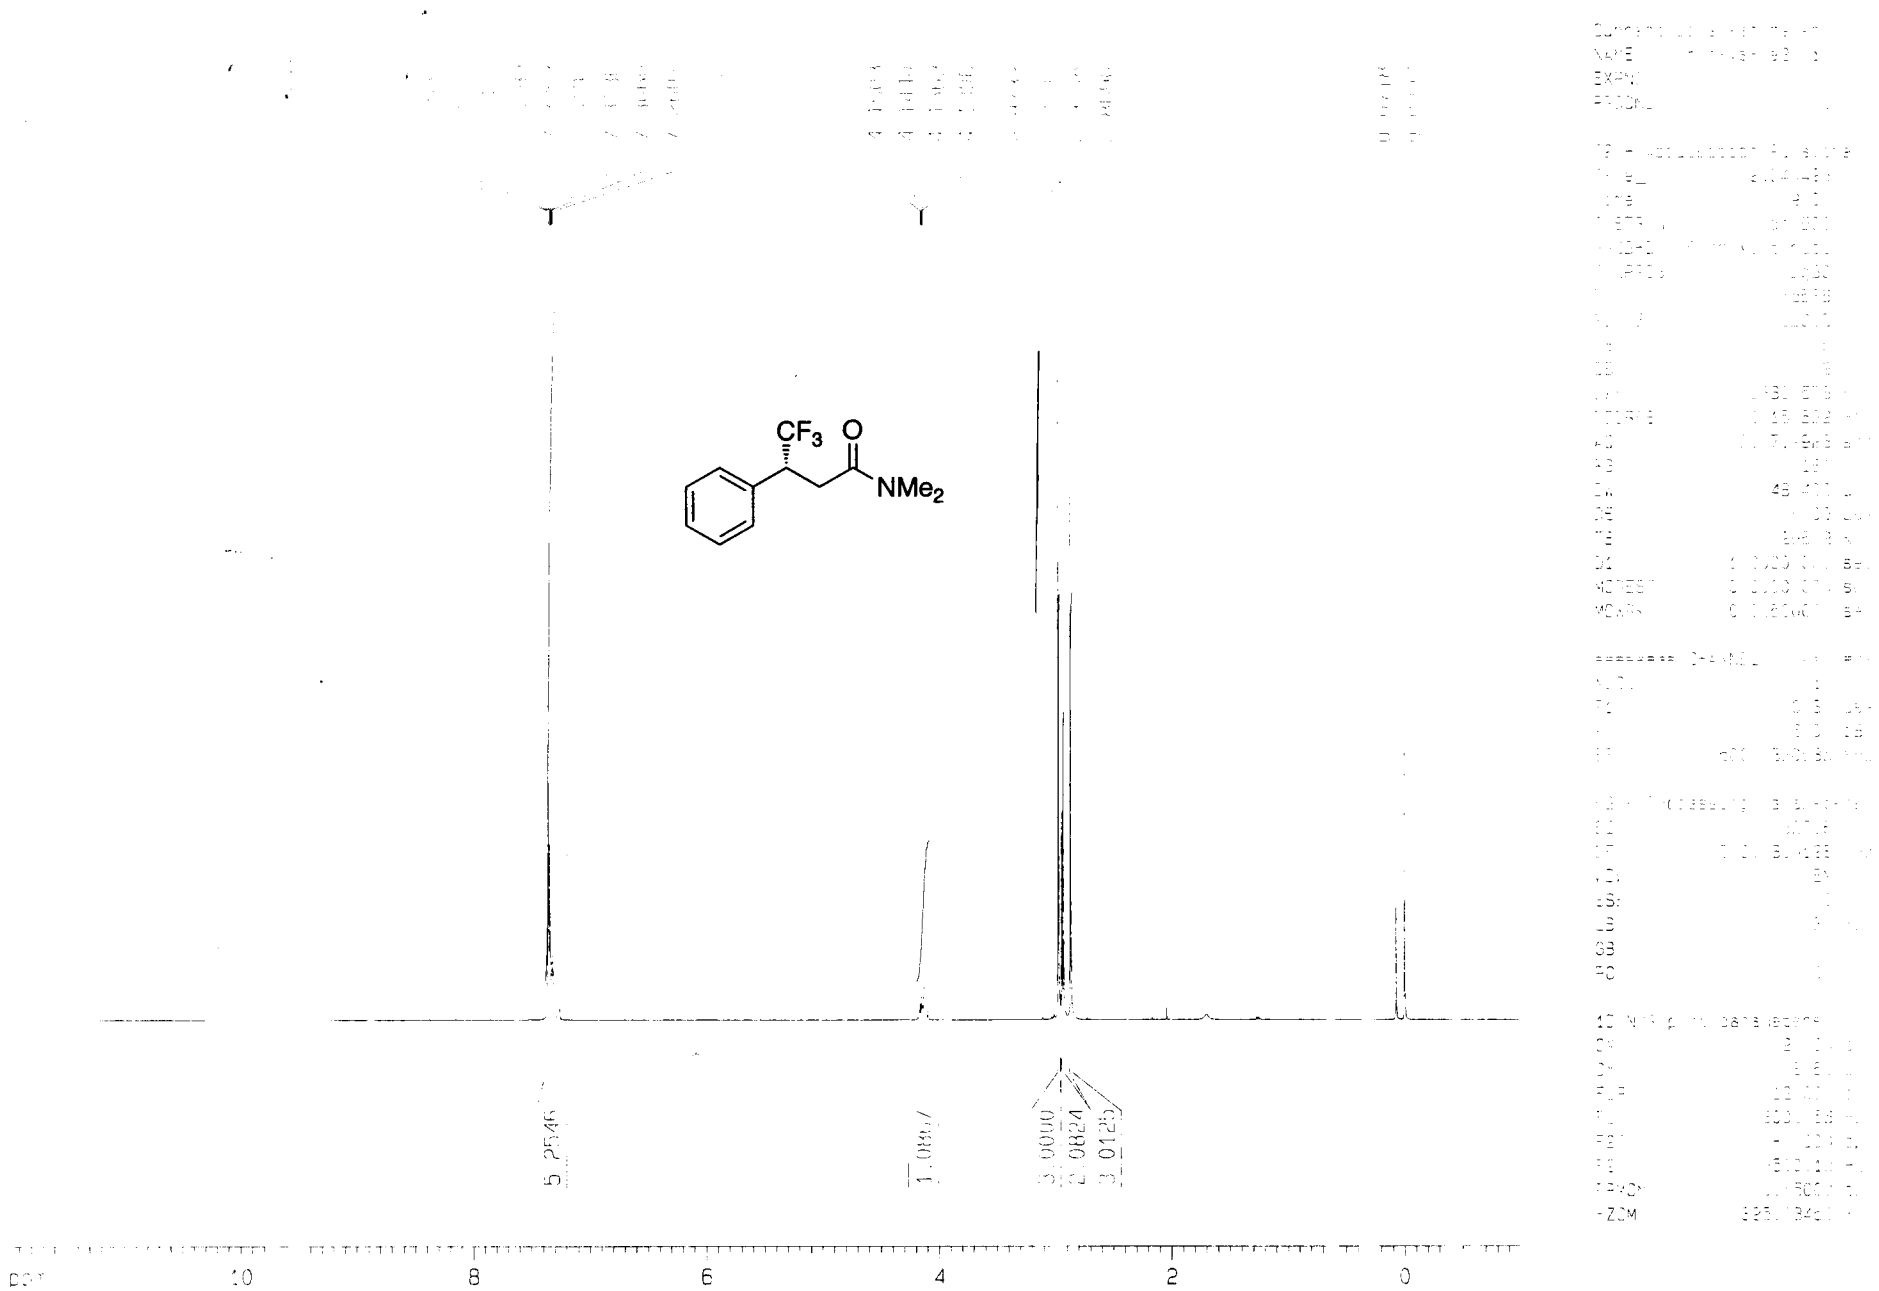

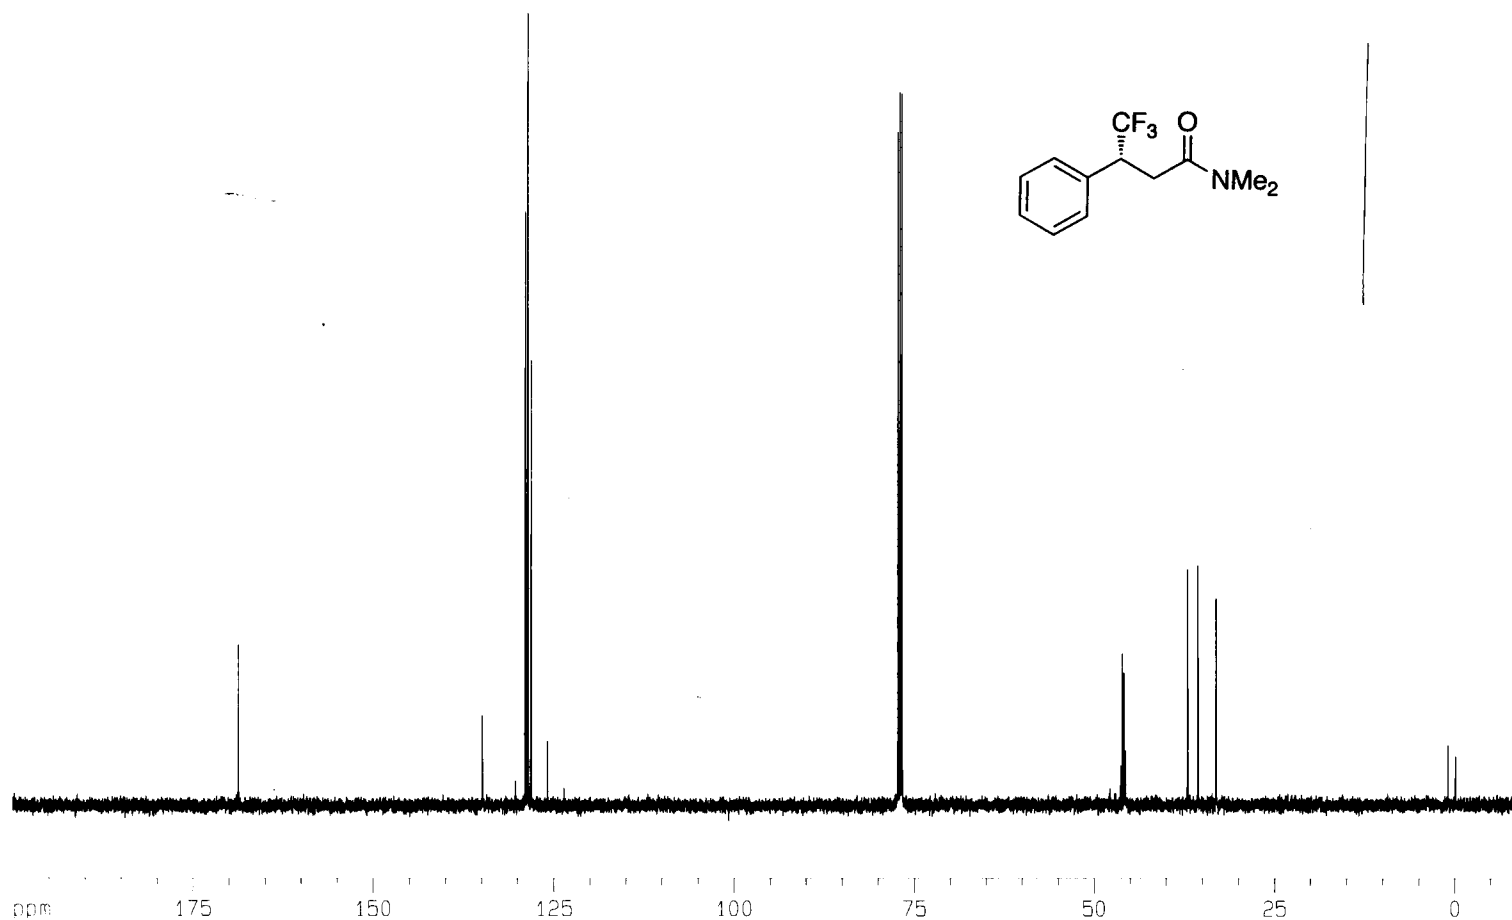

Current Data Parameters  
NAME tanaka-04.5.14-2  
EXPNO 1  
PROCNO 1

F2 - Acquisition Parameters  
Date\_ 20040514  
Time 11.50  
INSTRUM drx500  
PROBHD 5 mm Multinucl  
PULPROG zgpg30  
TD 65536  
SOLVENT CDCl3  
NS 256  
DS 2  
SWH 30030.029 Hz  
FIDRES 0.458222 Hz  
AQ 1.0912244 sec  
RG 5160.6  
DW 16.650 usec  
DE 6.00 usec  
TE 297.6 K  
D1 0.50000000 sec  
d11 0.03000000 sec  
MCREST 0.00000000 sec  
MCWRK 0.01500000 sec

==== CHANNEL f1 =====  
NUC1 13C  
P1 5.70 usec  
PL1 -2.00 dB  
SF01 125.7703643 MHz

==== CHANNEL f2 =====  
CPDPRG2 waltz16  
NUC2 1H  
PCPD2 100.00 usec  
PL2 -6.00 dB  
PL12 13.74 dB  
PL13 13.74 dB  
SF02 500.1320005 MHz

F2 - Processing parameters  
SI 32768  
SF 125.7577960 MHz  
WDW EM  
SSB 0  
LB 1.00 Hz  
GB 0  
PC 1.40

1D NMR plot parameters  
CX 20.00 cm  
CY 10.84 cm  
F1P 200.000 ppm  
F1 25151.56 Hz  
F2P -10.000 ppm  
F2 -1257.58 Hz  
PPMCM 10.50000 ppm/cm  
HZCM 1320.45679 Hz/cm

sample

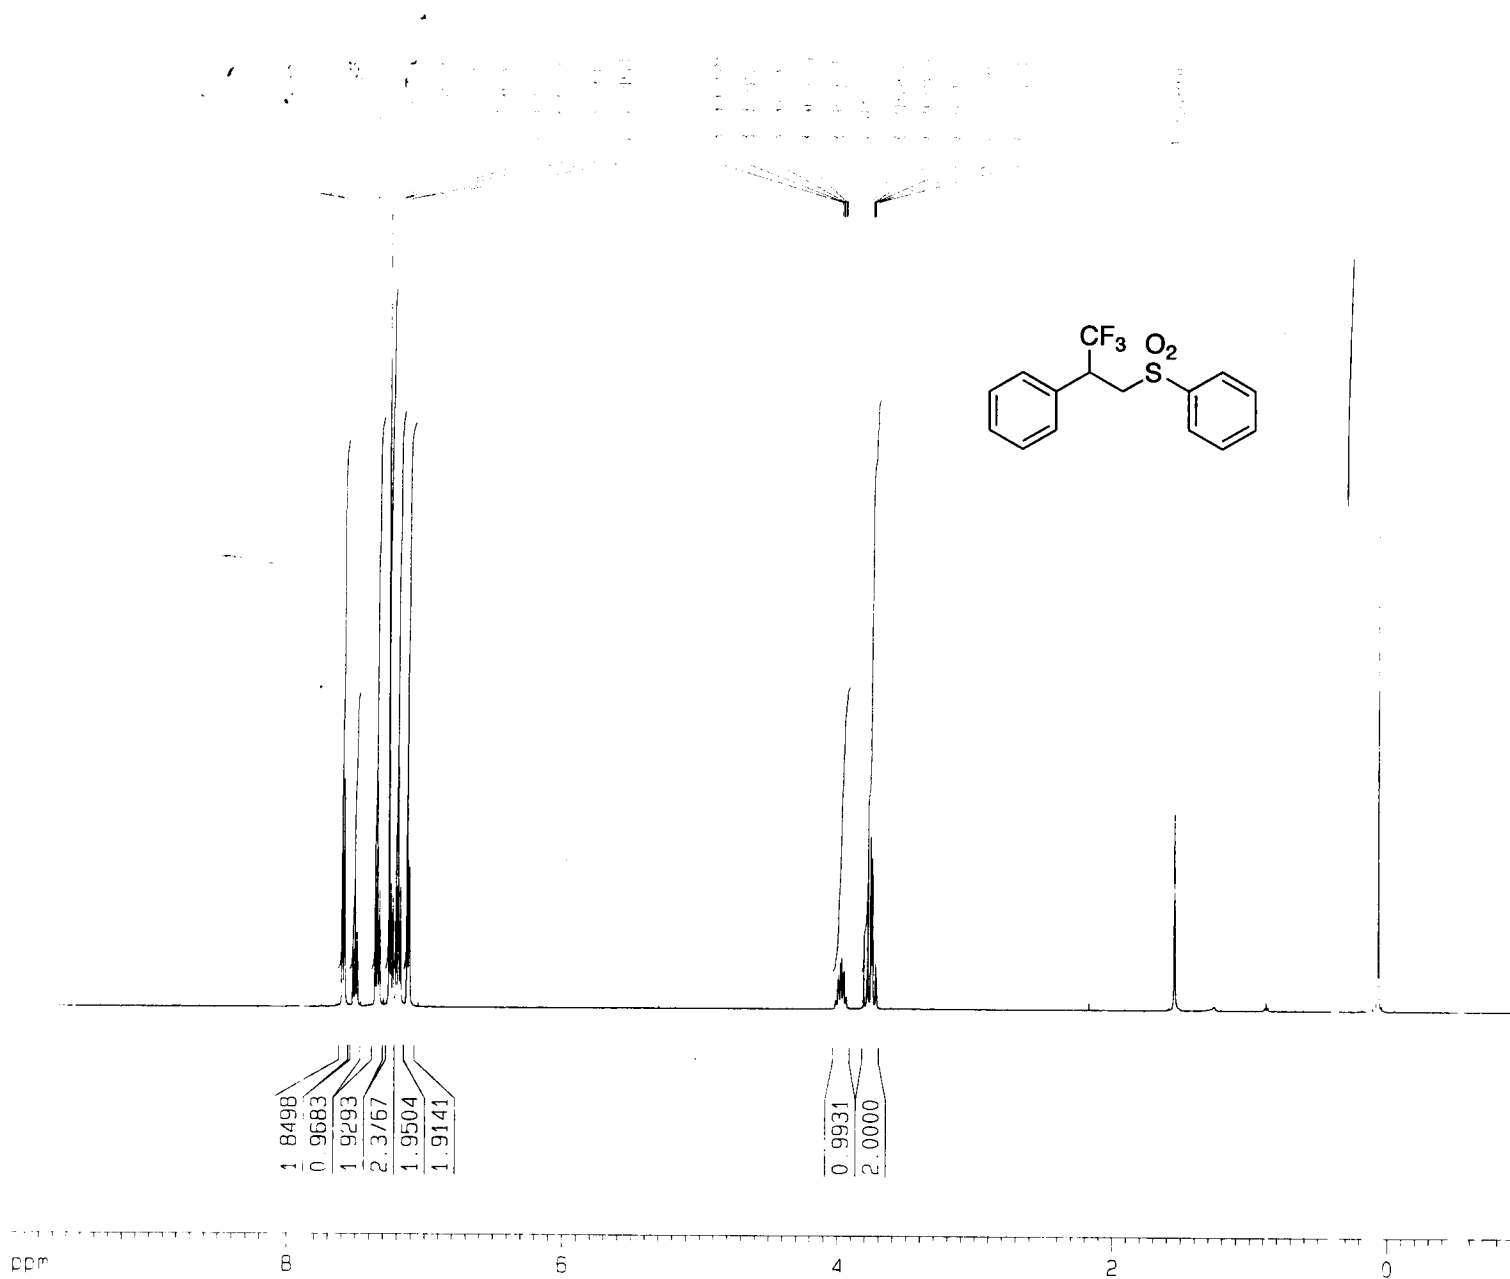

Current Data Parameters  
NAME: sample-3.10 -1  
EXPNO: 1  
PROCNO: 1

F2 - Acquisition Parameters  
Date\_ 20040310  
Time 12.46  
INSTRUM: spect  
PROBHD: 5 mm Multinucl  
PULPROG: zg30  
TD: 65536  
SOLVENT: CDCl3  
NS: 16  
DS: 2  
SWH: 10330.575 Hz  
FIDRES: 0.157532 Hz  
AQ: 3.1719923 sec  
RG: 812.7  
DW: 48.400 usec  
DE: 6.00 usec  
TE: 295.3 K  
D1: 1.0000000 sec  
MCREST: 0.0000000 sec  
MCWRK: 0.0150000 sec

==== CHANNEL f1 =====  
NUC1: 1H  
P1: 10.30 usec  
PL1: -6.00 dB  
SFO1: 500.1330885 MHz

F2 - Processing parameters  
SI: 32768  
SF: 500.1300134 MHz  
WDW: EM  
SSB: 0  
LB: 0.30 Hz  
GB: 0  
PC: 1.00

1D NMR plot parameters  
CX: 20.00 cm  
CY: 11.00 cm  
F1P: 10.000 ppm  
F1: 500.130 Hz  
F2P: -1.000 ppm  
F2: -500.13 Hz  
PPMCM: 0.55000 ppm/cm  
HZCM: 275.07150 Hz/cm

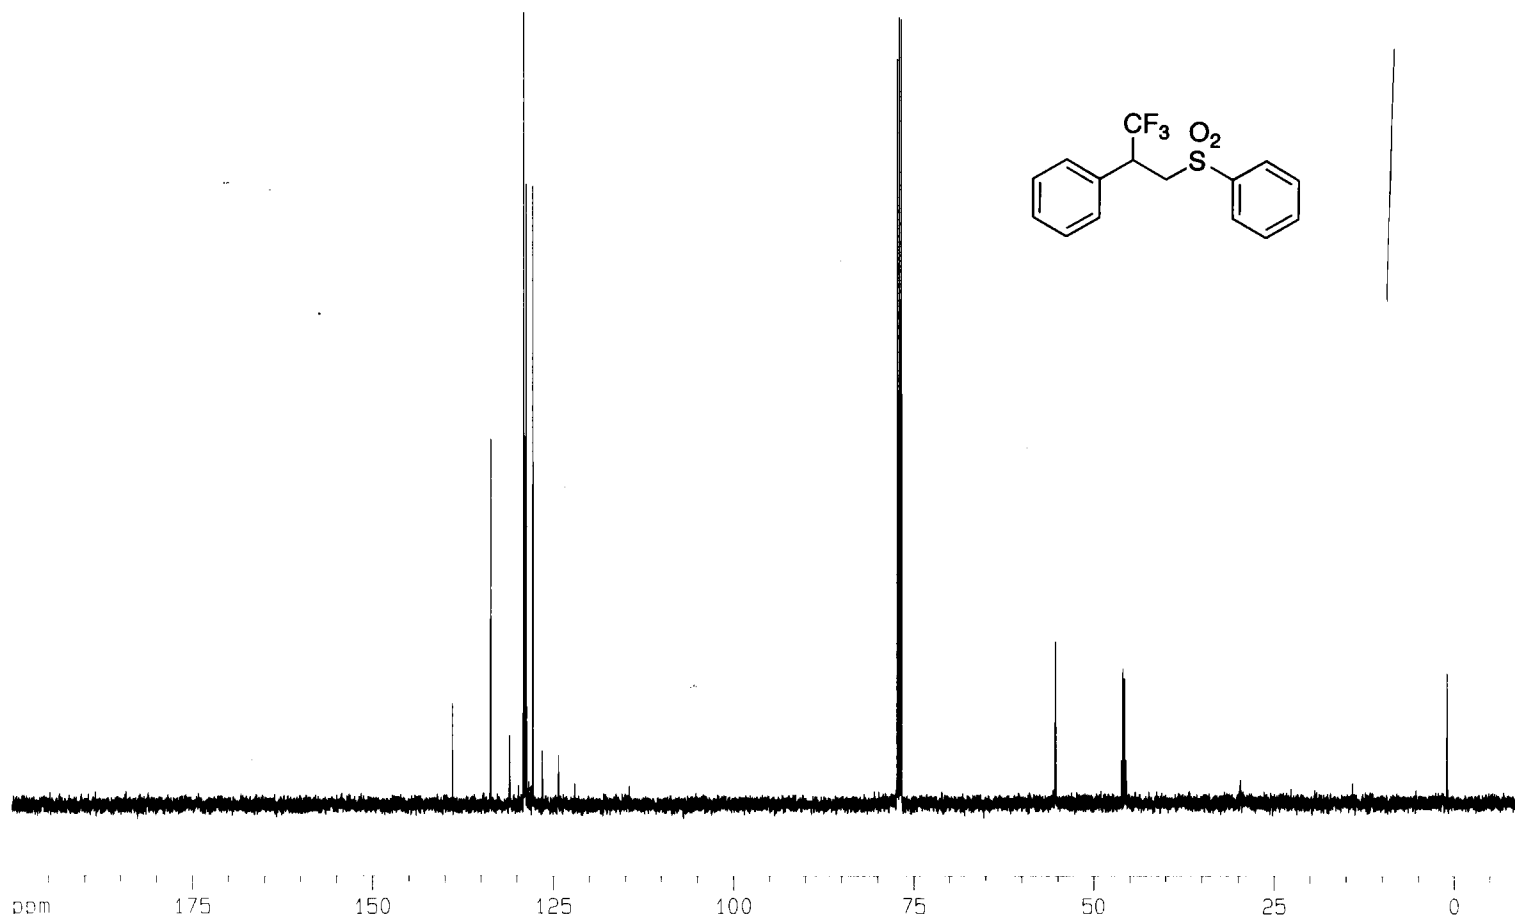

Current Data Parameters  
NAME tanaka-04.5.19-1  
EXPNO 1  
PROCNO 1

F2 - Acquisition Parameters  
Date\_ 20040519  
Time 19.05  
INSTRUM drx500  
PROBHD 5 mm Multinucl  
PULPROG zgpg30  
TD 65536  
SOLVENT CDCl3  
NS 256  
DS 2  
SWH 30030.029 Hz  
FIDRES 0.458222 Hz  
AQ 1.0912244 sec  
RG 2580.3  
DW 16.650 usec  
DE 6.00 usec  
TE 297.4 K  
D1 0.5000000 sec  
d11 0.0300000 sec  
MCREST 0.0000000 sec  
MCWAK 0.0150000 sec

===== CHANNEL f1 =====  
NUC1 13C  
P1 5.70 usec  
PL1 -2.00 dB  
SF01 125.7703643 MHz

===== CHANNEL f2 =====  
CPDPRG2 waltz16  
NUC2 1H  
PCPD2 100.00 usec  
PL2 -6.00 dB  
PL12 13.74 dB  
PL13 13.74 dB  
SF02 500.1320005 MHz

F2 - Processing parameters  
SI 32768  
SF 125.7577951 MHz  
WDW EM  
SSB 0  
LB 1.00 Hz  
GB 0  
PC 1.40

1D NMR plot parameters  
CX 20.00 cm  
CY 10.60 cm  
F1P 200.000 ppm  
F1 25151.56 Hz  
F2P -10.000 ppm  
F2 -1257.58 Hz  
PPMCM 10.50000 ppm/cm  
HZCM 1320.45679 Hz/cm

sample

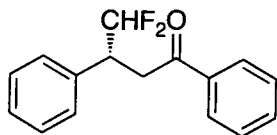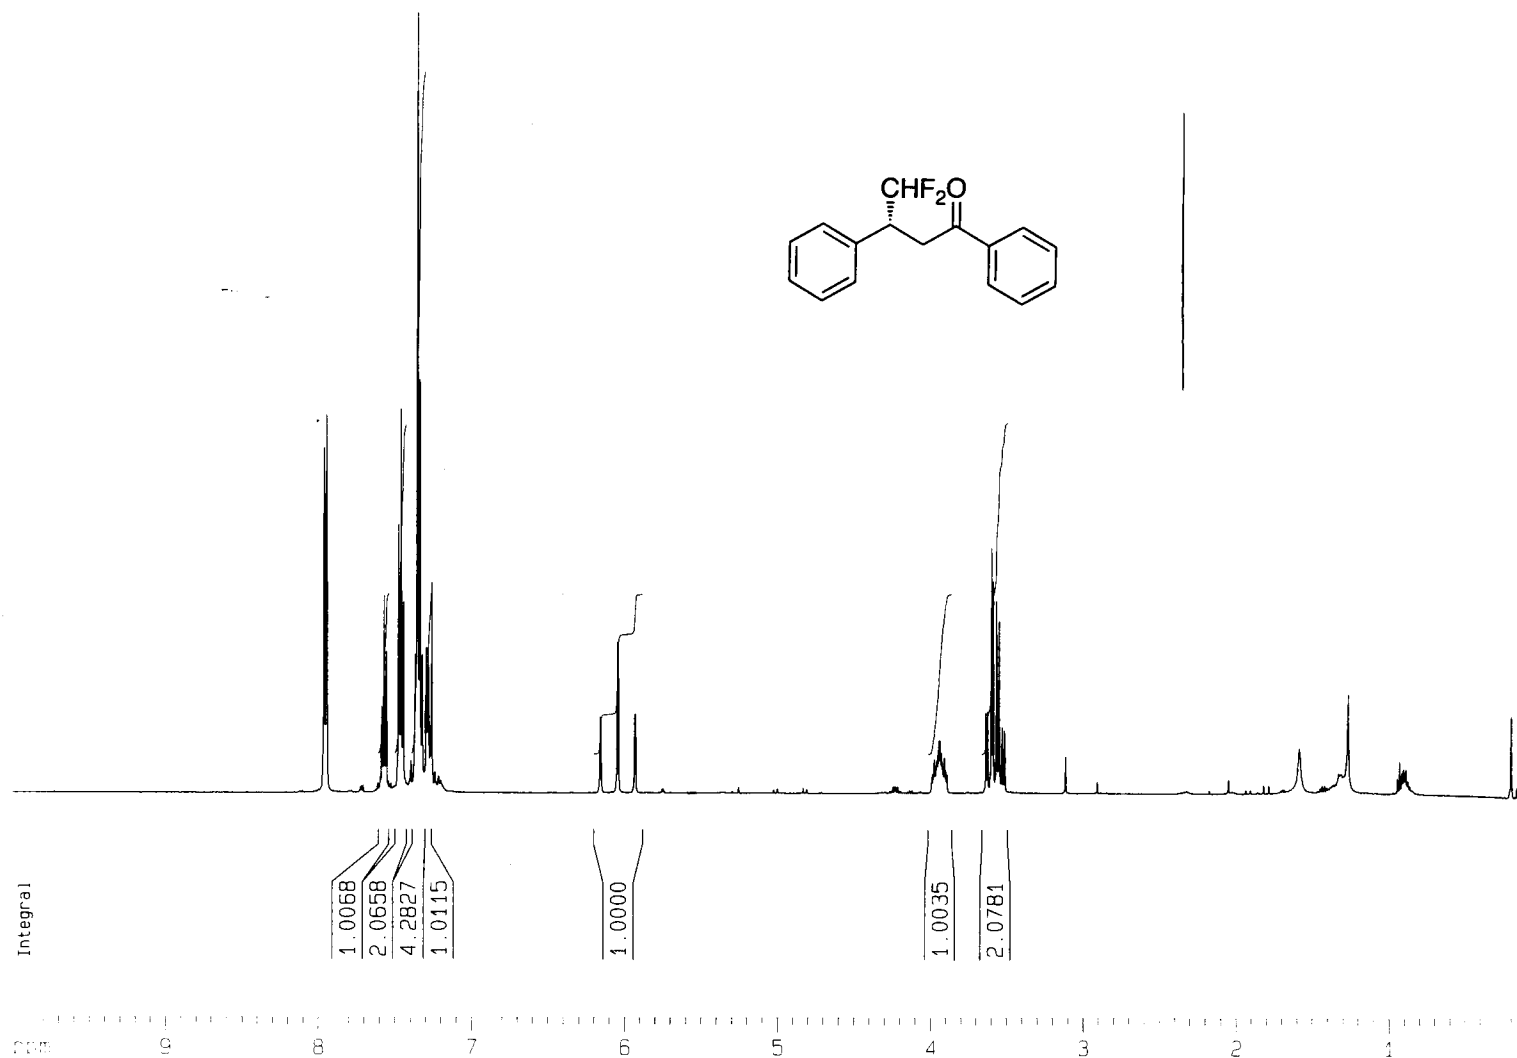

Current Data Parameters

NAME f2  
EXPNO 1  
PROCNO 1

F2 - Acquisition Parameters

Date\_ 20041227  
Time 15.54  
INSTRUM drx500  
PROBHD 5 mm Multinucl  
PULPROG zg30  
TD 65536  
SOLVENT CDCl3  
NS 16  
DS 2  
SWH 10330.578 Hz  
FIDRES 0.157632 Hz  
AQ 3.1719923 sec  
RG 128  
DW 48.400 usec  
DE 6.00 usec  
TE 296.1 K  
D1 1.00000000 sec  
MCREST 0.00000000 sec  
MCWRK 0.01500000 sec

==== CHANNEL f1 =====

NUC1 1H  
P1 10.30 usec  
PL1 -6.00 dB  
SF01 500.1330885 MHz

F2 - Processing parameters

SI 32768  
SF 500.1300129 MHz  
WDW EM  
SSB 0  
LB 0.30 Hz  
GB 0  
PC 1.00

1D NMR plot parameters

CX 20.00 cm  
CY 225.49 cm  
F1P 10.000 ppm  
F1 5001.30 Hz  
F2P 0.100 ppm  
F2 50.01 Hz  
PPMCM 0.49500 ppm/cm  
HZCM 247.56436 Hz/cm



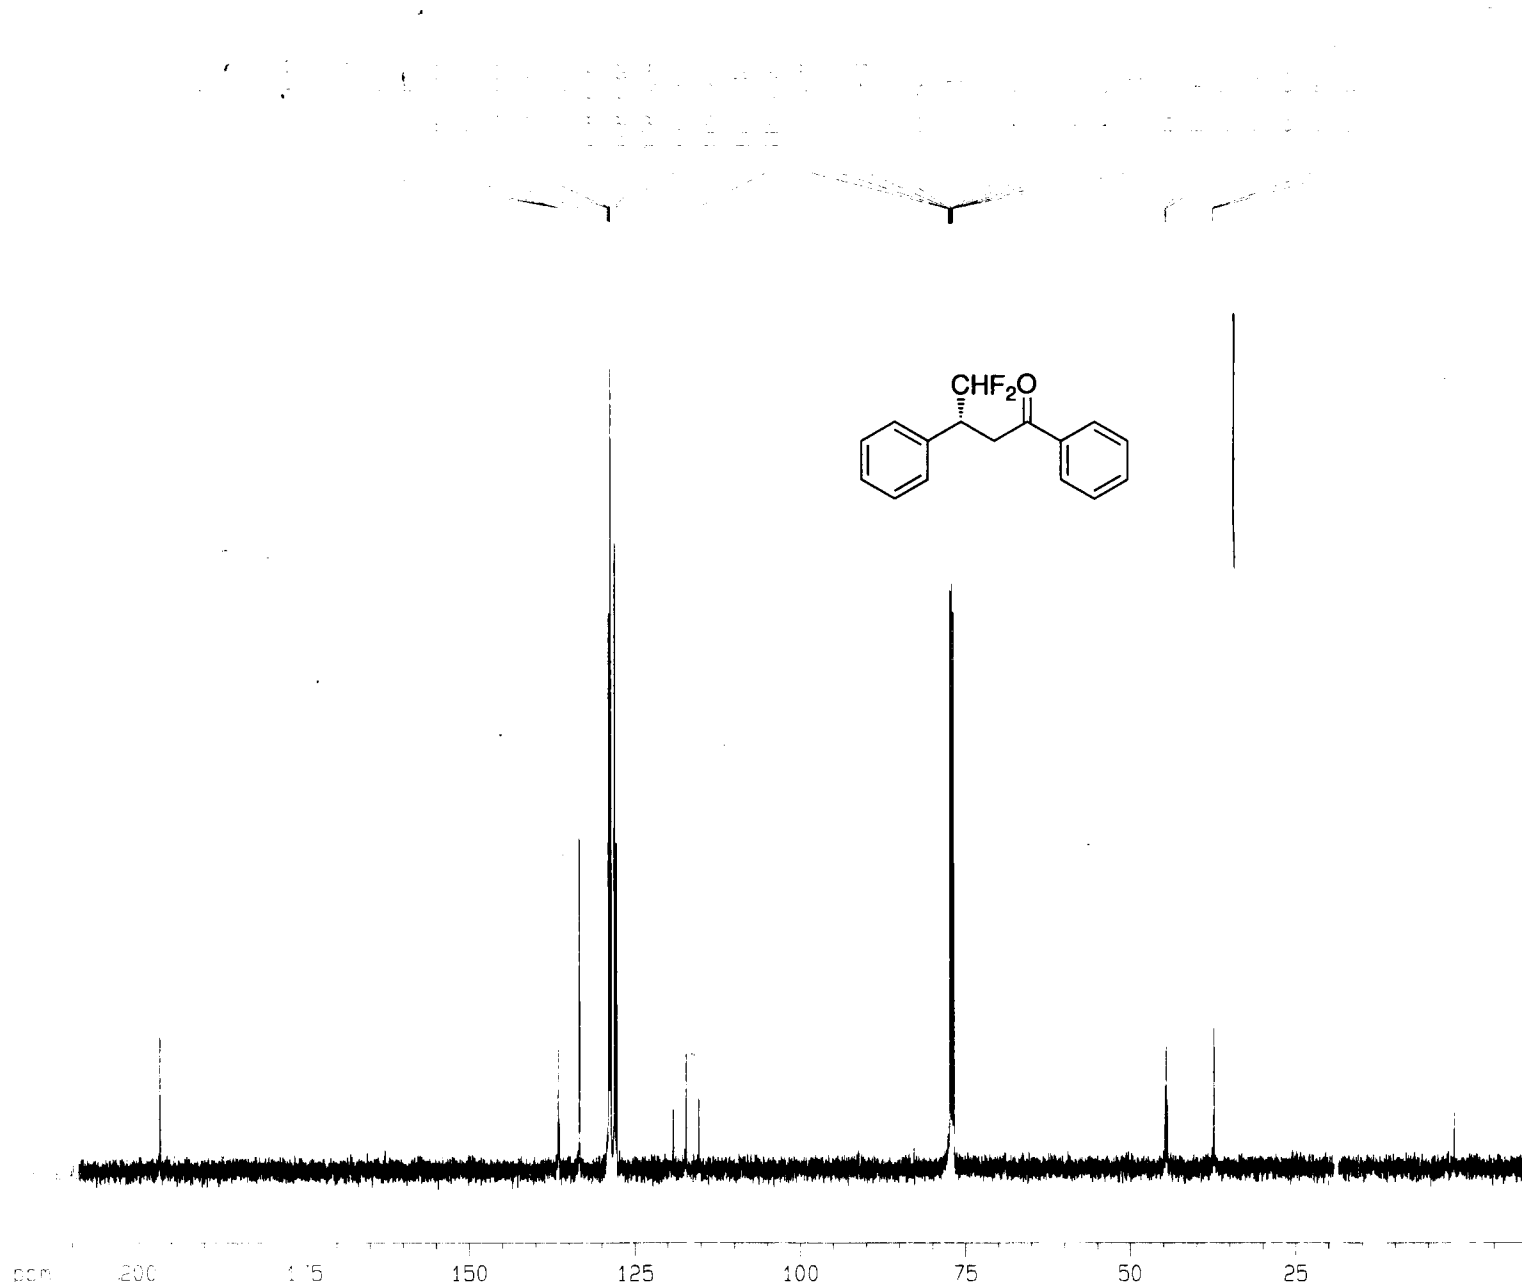

===== CHANNEL #1 =====  
NUC1 13C  
P1 5.70 usec  
PL1 -2.00 dB  
SF01 125.7703643 MHz

===== CHANNEL #2 =====  
CPUFRG2 waitz15  
NUC2 1H  
PCPD2 100.00 usec  
PL2 -6.00 dB  
PL12 3.74 dB  
PL13 3.74 dB  
SF02 500.1330005 MHz

F2 - Processing parameters  
SI 32768  
SF 125.7577969 MHz  
WDW EM  
SSB 0  
LB 1.00 Hz  
GB 0  
PC 0.10

1D NMR plot parameters  
CX 20.00 cm  
CY 10.73 cm  
F1P 219.000 ppm  
F1 27540.96 Hz  
F2P -10.000 ppm  
F2 -1257.58 Hz  
PPMCM 11.45000 ppm/cm  
HZCM 1439.92676 Hz/cm

sample

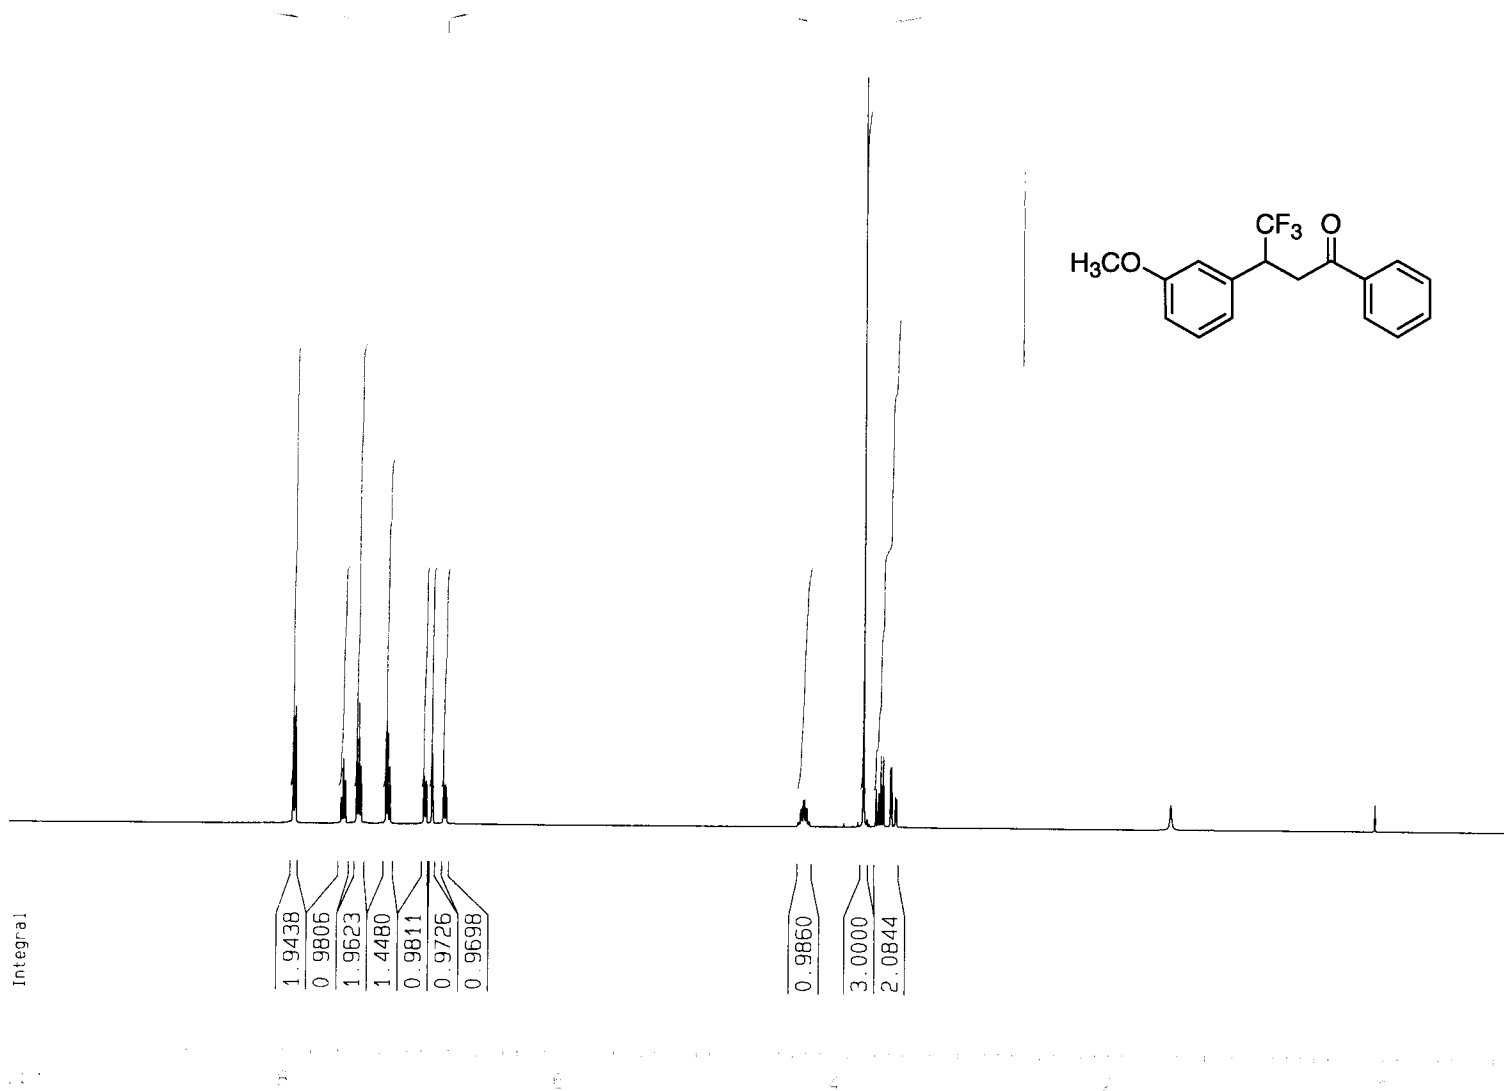

Current Data Parameters  
NAME morigaki060718  
EXPNO 1  
PROCNO 1

F2 - Acquisition Parameters  
Date\_ 20060718  
Time 21.28  
INSTRUM drx500  
PROBHD 5 mm Multinucl  
PULPROG zg30  
TD 65536  
SOLVENT CDC13  
NS 16  
DS 2  
SWH 10330.578 Hz  
FIDRES 0.157632 Hz  
AQ 3.1719923 sec  
RG 645.1  
DW 48.400 usec  
DE 6.00 usec  
TE 299.7 K  
D1 1.00000000 sec  
MCREST 0.00000000 sec  
MCWRK 0.01500000 sec

==== CHANNEL f1 =====  
NUC1 1H  
P1 10.00 usec  
PL1 -6.00 dB  
SFO1 500.1330885 MHz

F2 - Processing parameters  
SI 32768  
SF 500.1300131 MHz  
WDW EM  
SSB 0  
LB 0.30 Hz  
GB 0  
PC 1.00

1D NMR plot parameters  
CX 20.00 cm  
CY 10.03 cm  
F1P 10.000 ppm  
F1 5001.30 Hz  
F2P -1.000 ppm  
F2 -500.13 Hz  
PPMCM 0.55000 ppm/cm  
HZCM 275.07150 Hz/cm

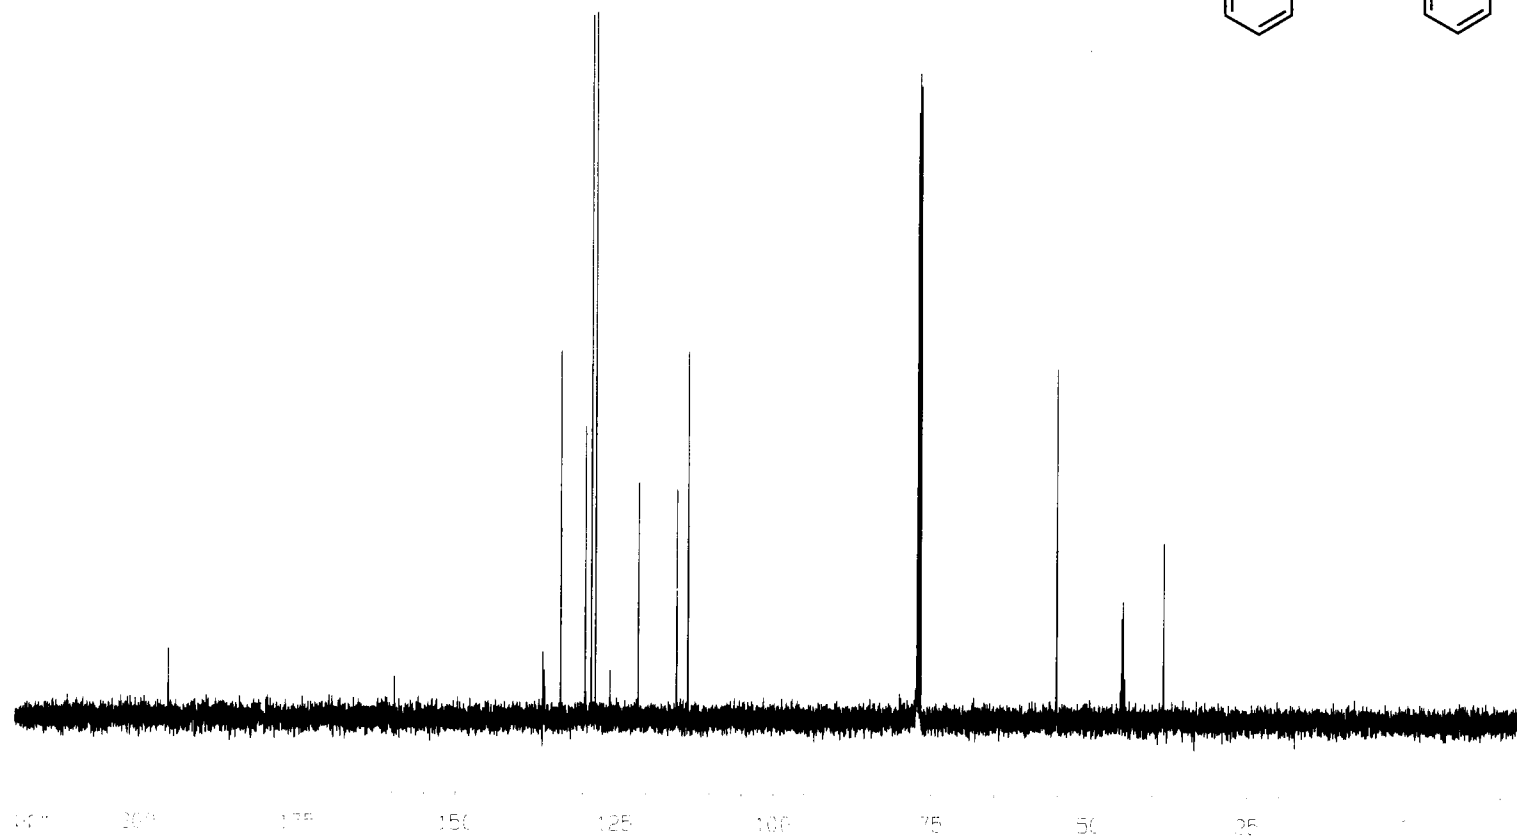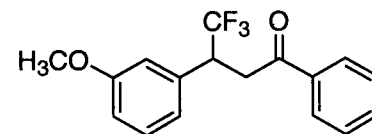

Current Data Parameters  
NAME morigaki060718  
EXPNO 2  
PROCNO 1

F2 - Acquisition Parameters  
Date\_ 20060718  
Time 21.37  
INSTRUM drx500  
PROBHD 5 mm Multinucl  
PULPROG zgpg30  
TD 65536  
SOLVENT CDCl3  
NS 256  
DS 2  
SWH 30030.029 Hz  
FIDRES 0.458222 Hz  
AQ 1.0912244 sec  
RG 1824.6  
DW 16.650 usec  
DE 6.00 usec  
TE 300.0 K  
D1 0.5000000 sec  
d11 0.0300000 sec  
MCREST 0.0000000 sec  
MCWRK 0.0150000 sec

==== CHANNEL f1 =====  
NUC1 13C  
P1 11.00 usec  
PL1 -3.00 dB  
SF01 125.7703643 MHz

==== CHANNEL f2 =====  
CPDPRG2 waltz16  
NUC2 1H  
PCPD2 100.00 usec  
PL2 -6.00 dB  
PL12 17.00 dB  
PL13 19.00 dB  
SF02 500.1320005 MHz

F2 - Processing parameters  
SI 32768  
SF 125.7577914 MHz  
WDW EM  
SSB 0  
LB 1.00 Hz  
GB 0  
PC 1.40

1D NMR plot parameters  
CX 20.00 cm  
CY 9.44 cm  
F1P 219.373 ppm  
F1 27587.91 Hz  
F2P -19.419 ppm  
F2 -2442.12 Hz  
PPMCM 11.93963 ppm/cm  
HZCM 1501.50146 Hz/cm

sample

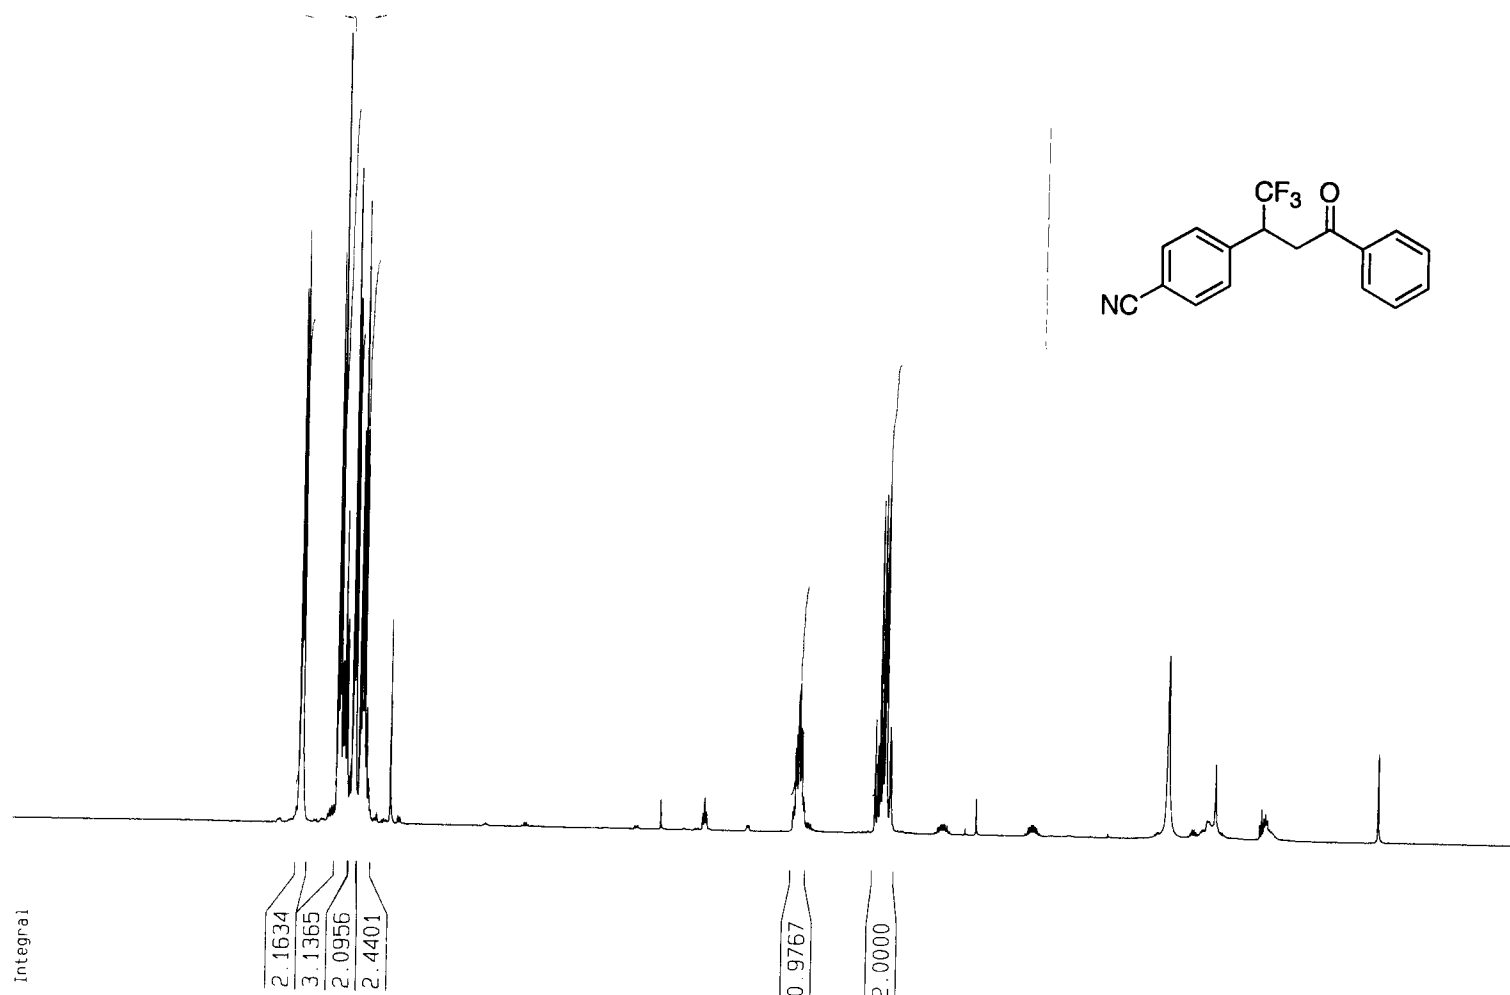

Current Data Parameters  
NAME gaki060711  
EXPNO 2  
PROCNO 1

F2 - Acquisition Parameters  
Date\_ 20060712  
Time 21.15  
INSTRUM drx500  
PROBHD 5 mm Multinucl  
PULPROG zg30  
TD 65536  
SOLVENT CDCl3  
NS 16  
DS 2  
SWH 10330.578 Hz  
FIDRES 0.157632 Hz  
AQ 3.1719923 sec  
RG 362  
DW 48.400 usec  
DE 6.00 usec  
TE 300.0 K  
D1 1.00000000 sec  
MCREST 0.00000000 sec  
MCWRK 0.01500000 sec

==== CHANNEL f1 =====  
NUC1 1H  
P1 10.00 usec  
PL1 -6.00 dB  
SF01 500.1330885 MHz

F2 - Processing parameters  
SI 32768  
SF 500.1300131 MHz  
WDW EM  
SSB 0  
LB 0.30 Hz  
GB 0  
PC 1.00

1D NMR plot parameters  
CX 20.00 cm  
CY 10.69 cm  
F1P 10.000 ppm  
F1 5001.30 Hz  
F2P -1.000 ppm  
F2 -500.13 Hz  
PPMCM 0.55000 ppm/cm  
HZCM 275.07150 Hz/cm

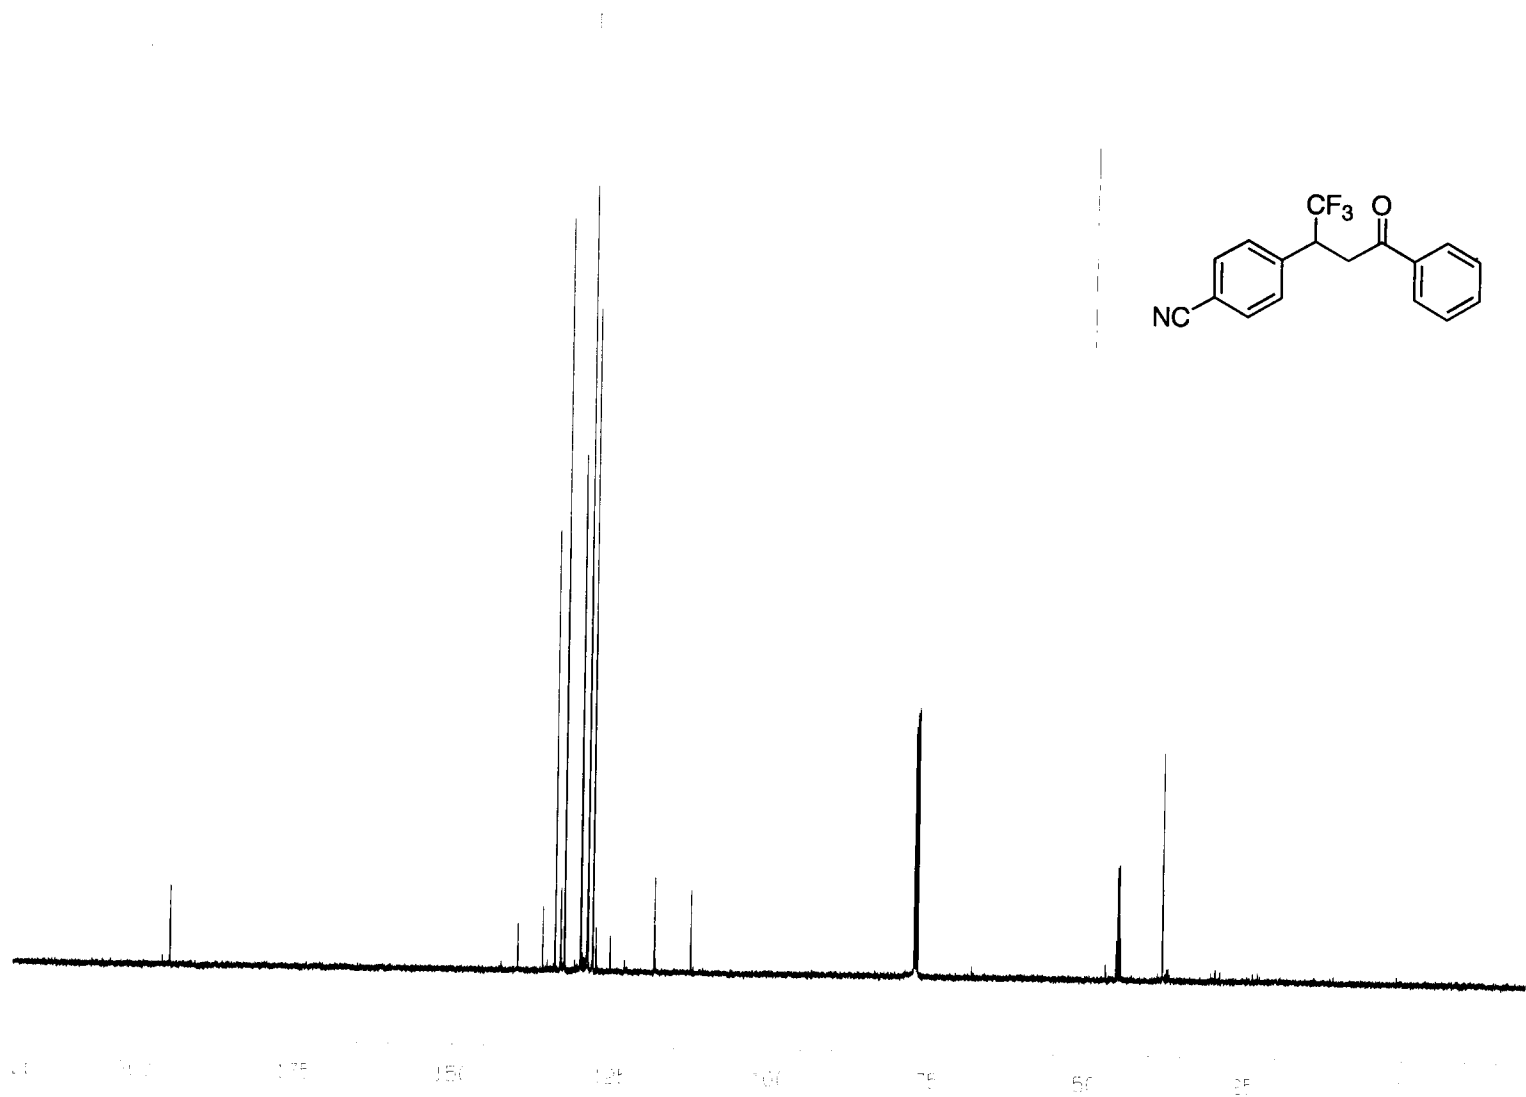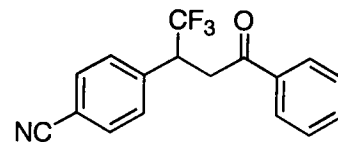

Current Data Parameters  
NAME gaki060711  
EXPNO 3  
PROCNO 1

F2 - Acquisition Parameters  
Date\_ 20060712  
Time 21.52  
INSTRUM drx500  
PROBHD 5 mm Multinuc1  
PULPROG zgpg30  
TD 65536  
SOLVENT CDCl3  
NS 1280  
DS 2  
SWH 30030.029 Hz  
FIDRES 0.458222 Hz  
AQ 1.0912244 sec  
RG 1824.6  
DW 16.650 usec  
DE 6.00 usec  
TE 300.6 K  
D1 0.50000000 sec  
d11 0.03000000 sec  
MCREST 0.00000000 sec  
MCWRK 0.01500000 sec

==== CHANNEL f1 =====  
NUC1 13C  
P1 11.00 usec  
PL1 -3.00 dB  
SF01 125.7703643 MHz

==== CHANNEL f2 =====  
CPDPRG2 waltz16  
NUC2 1H  
PCPD2 100.00 usec  
PL2 -6.00 dB  
PL12 17.00 dB  
PL13 19.00 dB  
SF02 500.1320005 MHz

F2 - Processing parameters  
SI 32768  
SF 125.7577932 MHz  
WDW EM  
SSB 0  
LB 1.00 Hz  
GB 0  
PC 1.40

1D NMR plot parameters  
CX 20.00 cm  
CY 10.43 cm  
F1P 219.359 ppm  
F1 27586.08 Hz  
F2P -19.434 ppm  
F2 -2443.95 Hz  
PPMCM 11.93963 ppm/cm  
HZCM 1501.50146 Hz/cm

sample

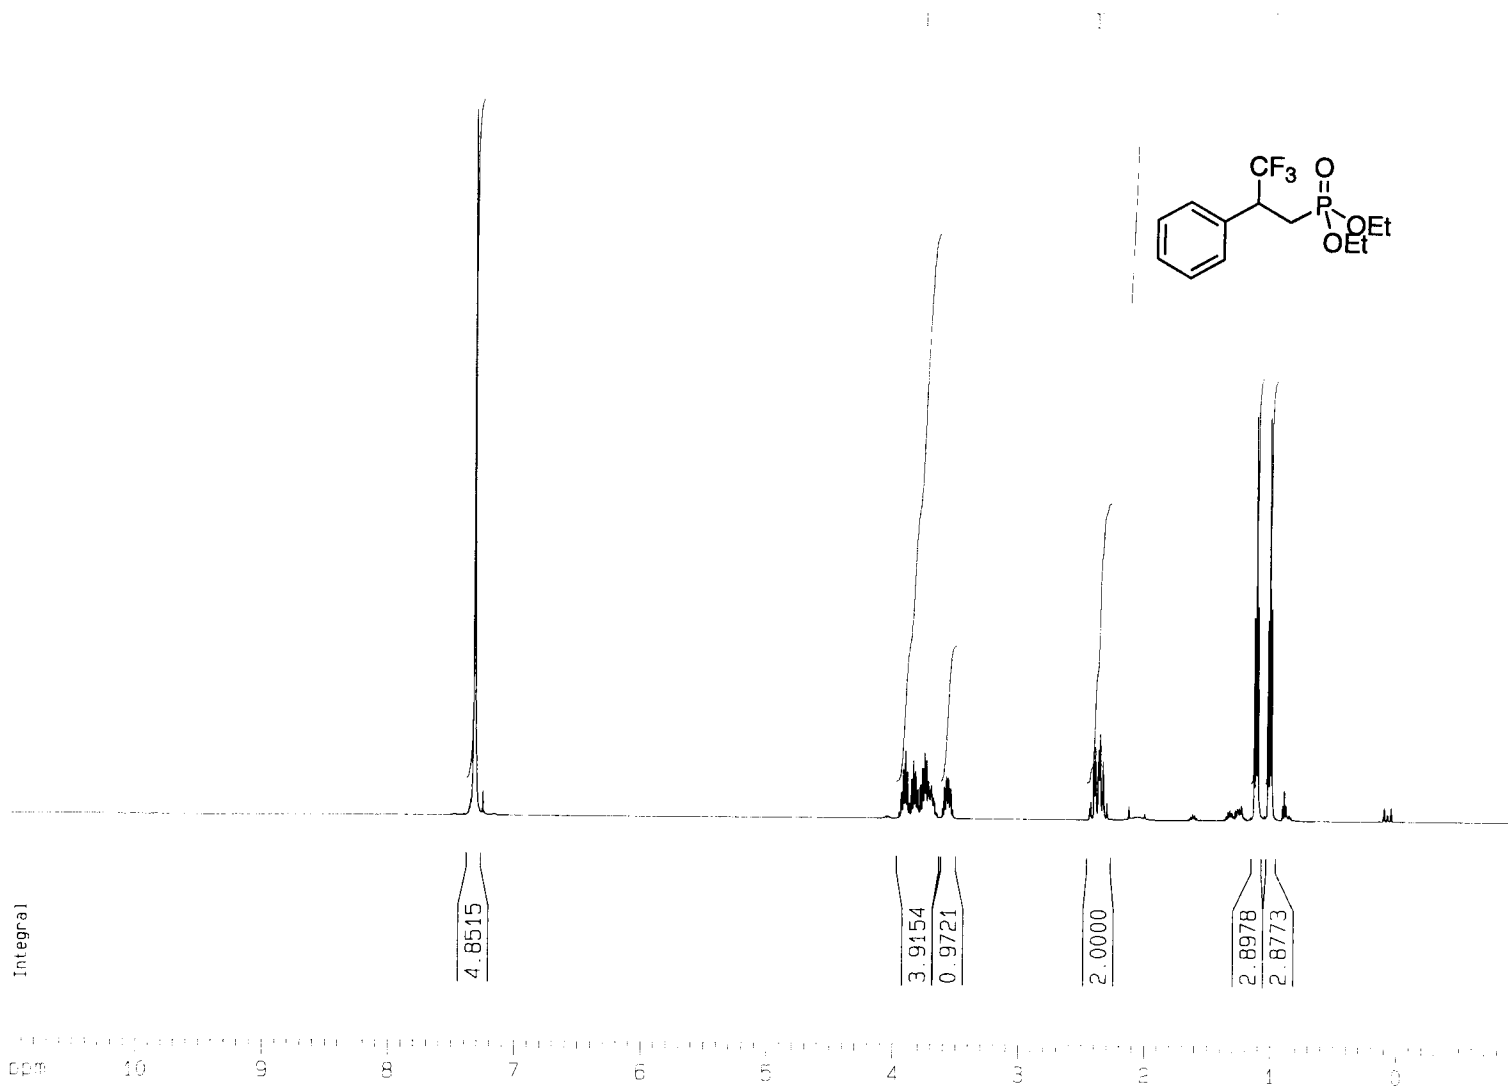

Current Data Parameters

NAME morigaki060807  
EXPNO 1  
PROCNO 1

F2 - Acquisition Parameters

Date\_ 20060807  
Time 21.59  
INSTRUM drx500  
PROBHD 5 mm Multinucl  
PULPROG zg30  
TD 65536  
SOLVENT CDCl3  
NS 16  
DS 2  
SWH 10330.578 Hz  
FIDRES 0.157632 Hz  
AQ 3.1719923 sec  
RG 57  
Dw 48.400 usec  
DE 6.00 usec  
TE 300.9 K  
D1 1.00000000 sec  
MCREST 0.00000000 sec  
MCWRK 0.01500000 sec

==== CHANNEL f1 =====

NUC1 1H  
P1 10.00 usec  
PL1 -6.00 dB  
SF01 500.1330885 MHz

F2 - Processing parameters

SI 32768  
SF 500.1300131 MHz  
WDW EM  
SSB 0  
LB 0.30 Hz  
GB 0  
PC 1.00

1D NMR plot parameters

CX 20.00 cm  
CY 9.40 cm  
F1P 11.000 ppm  
F1 5501.43 Hz  
F2P -1.000 ppm  
F2 -500.13 Hz  
PPMCM 0.60000 ppm/cm  
HZCM 300.07800 Hz/cm

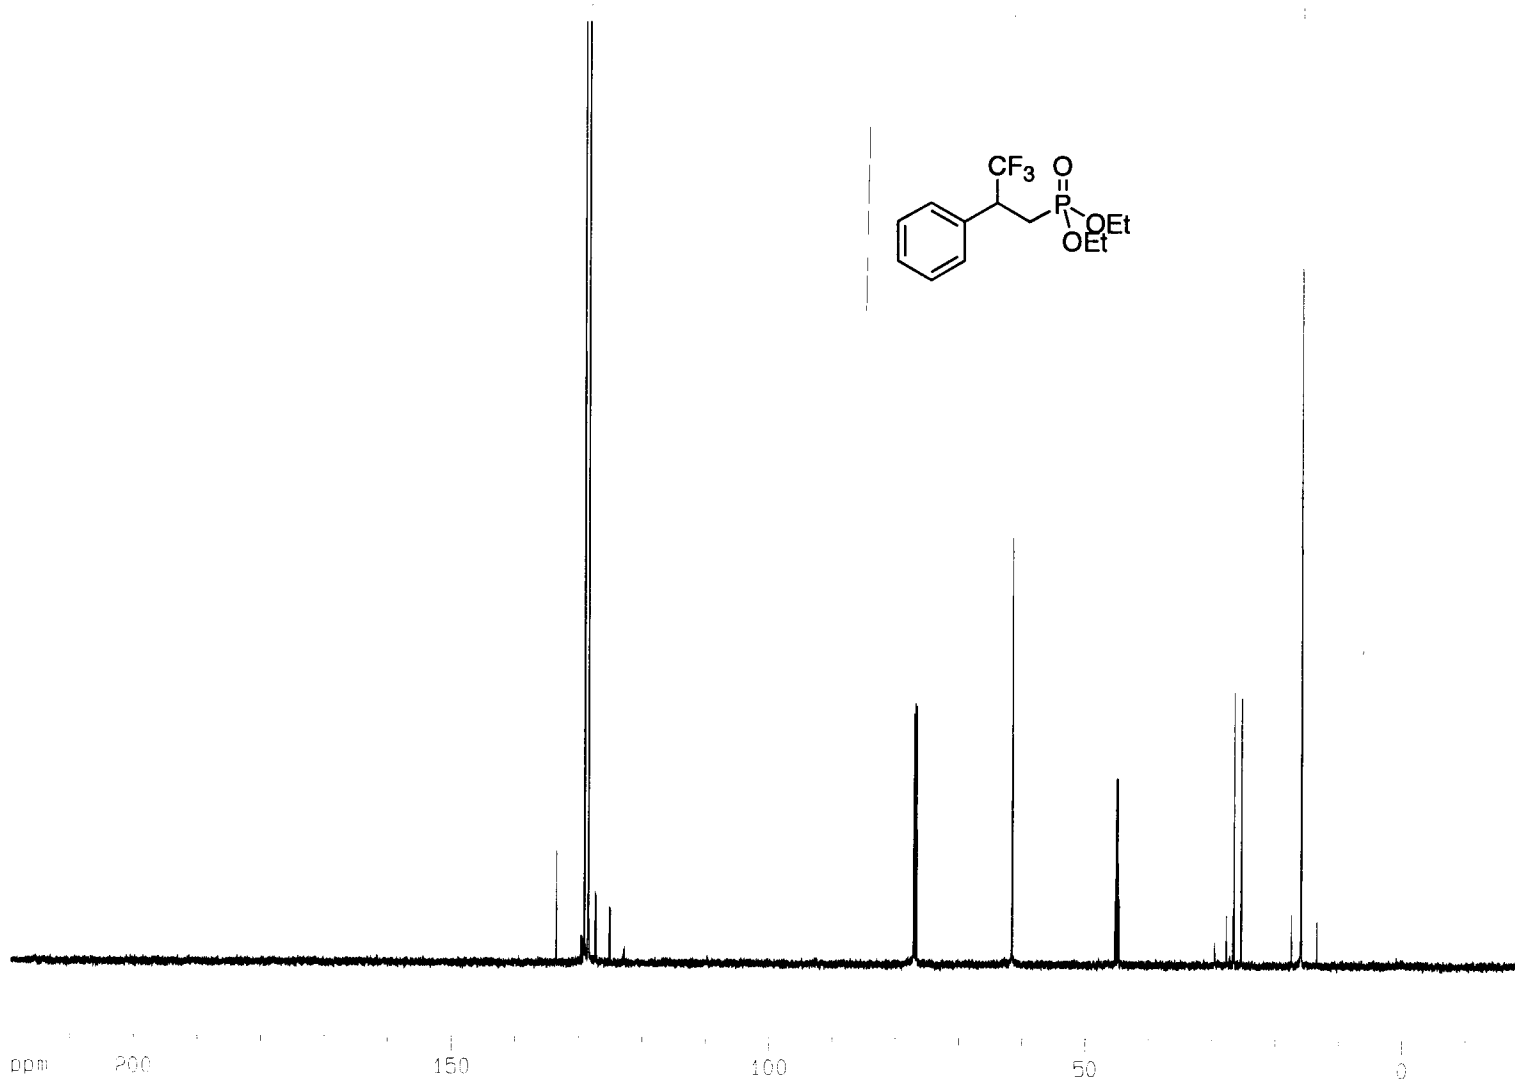

Current Data Parameters  
NAME morigaki060807  
EXPNO 2  
PROCNO 1

F2 - Acquisition Parameters  
Date\_ 20060807  
Time 22.15  
INSTAUM drx500  
PROBHD 5 mm Multinuc1  
PULPROG zgpg30  
ID 65536  
SOLVENT CDCl3  
NS 512  
DS 2  
SWH 30030.029 Hz  
FIDRES 0.458222 Hz  
AQ 1.0912244 sec  
RG 1149.4  
DW 16.650 usec  
DE 6.00 usec  
TE 301.3 K  
D1 0.50000000 sec  
d11 0.03000000 sec  
MCREST 0.00000000 sec  
MCWAK 0.01500000 sec

==== CHANNEL f1 =====  
NUC1 13C  
P1 11.00 usec  
PL1 -3.00 dB  
SF01 125.7703643 MHz

==== CHANNEL f2 =====  
CPDPRG2 waltz16  
NUC2 1H  
PCPD2 100.00 usec  
PL2 -6.00 dB  
PL12 17.00 dB  
PL13 19.00 dB  
SF02 500.1320005 MHz

F2 - Processing parameters  
SI 32768  
SF 125.7577950 MHz  
WDW EM  
SSB 0  
LB 1.00 Hz  
GB 0  
PC 0.00

1D NMR plot parameters  
CX 20.00 cm  
CY 28.16 cm  
F1P 219.337 ppm  
F1 27583.33 Hz  
F2P -19.456 ppm  
F2 -2446.70 Hz  
PPMCM 11.93963 ppm/cm  
HZCM 1501.50146 Hz/cm
